# Supplementary material for: Assembly-controlled supramolecular aggregation-induced emission systems based on amphiphilic block polymer hosts
Source: Royal Society of Chemistry journal article supplement (doi:10.1039/d4py01009d), 2024-11-18
Supplement: d4py01009d1.pdf [file d4py01009d1.pdf]

Electronic Supplementary Material (ESI) for Polymer Chemistry.  
This journal is © The Royal Society of Chemistry 2018

## Electronic Supplementary Information

### Assembly-Controlled Supramolecular Aggregation-Induced Emission Systems based on Amphiphilic Block Polymer Hosts

*Yu-Qi Zhu,<sup>a</sup> Zhong-Yuan Chen,<sup>a</sup> Zhi-Wei Zhou,<sup>a</sup> Zhaojun Chen,<sup>\*a</sup> Ming-Xue Wu,<sup>\*a</sup> and Xing-Huo Wang<sup>\*a</sup>*

<sup>a</sup>Institute for Sustainable Energy and Resources, College of Chemistry and Chemical Engineering, Qingdao University, 308 Ningxia Road, Qingdao 266071, P. R. China

E-mail: wxh93@qdu.edu.cn; wmx517@qdu.edu.cn; chenzhaojun@qdu.edu.cn

### Content

|                                                                     |            |
|---------------------------------------------------------------------|------------|
| <b>1. Synthesis.....</b>                                            | <b>S2</b>  |
| <b>2. Characterization of host-guest interactions.....</b>          | <b>S11</b> |
| <b>3. Fluorescence enhancement of supramolecular networks.....</b>  | <b>S15</b> |
| <b>4. Stimuli-responsive behavior .....</b>                         | <b>S21</b> |
| <b>5. Fluorescence enhancement of supramolecular assembly .....</b> | <b>S23</b> |
| <b>6. Characterization of morphology.....</b>                       | <b>S30</b> |
| <b>7. Fabrication of artificial light-harvesting systems .....</b>  | <b>S32</b> |
| <b>8. Information encryption matrix.....</b>                        | <b>S40</b> |

## 1. Synthesis

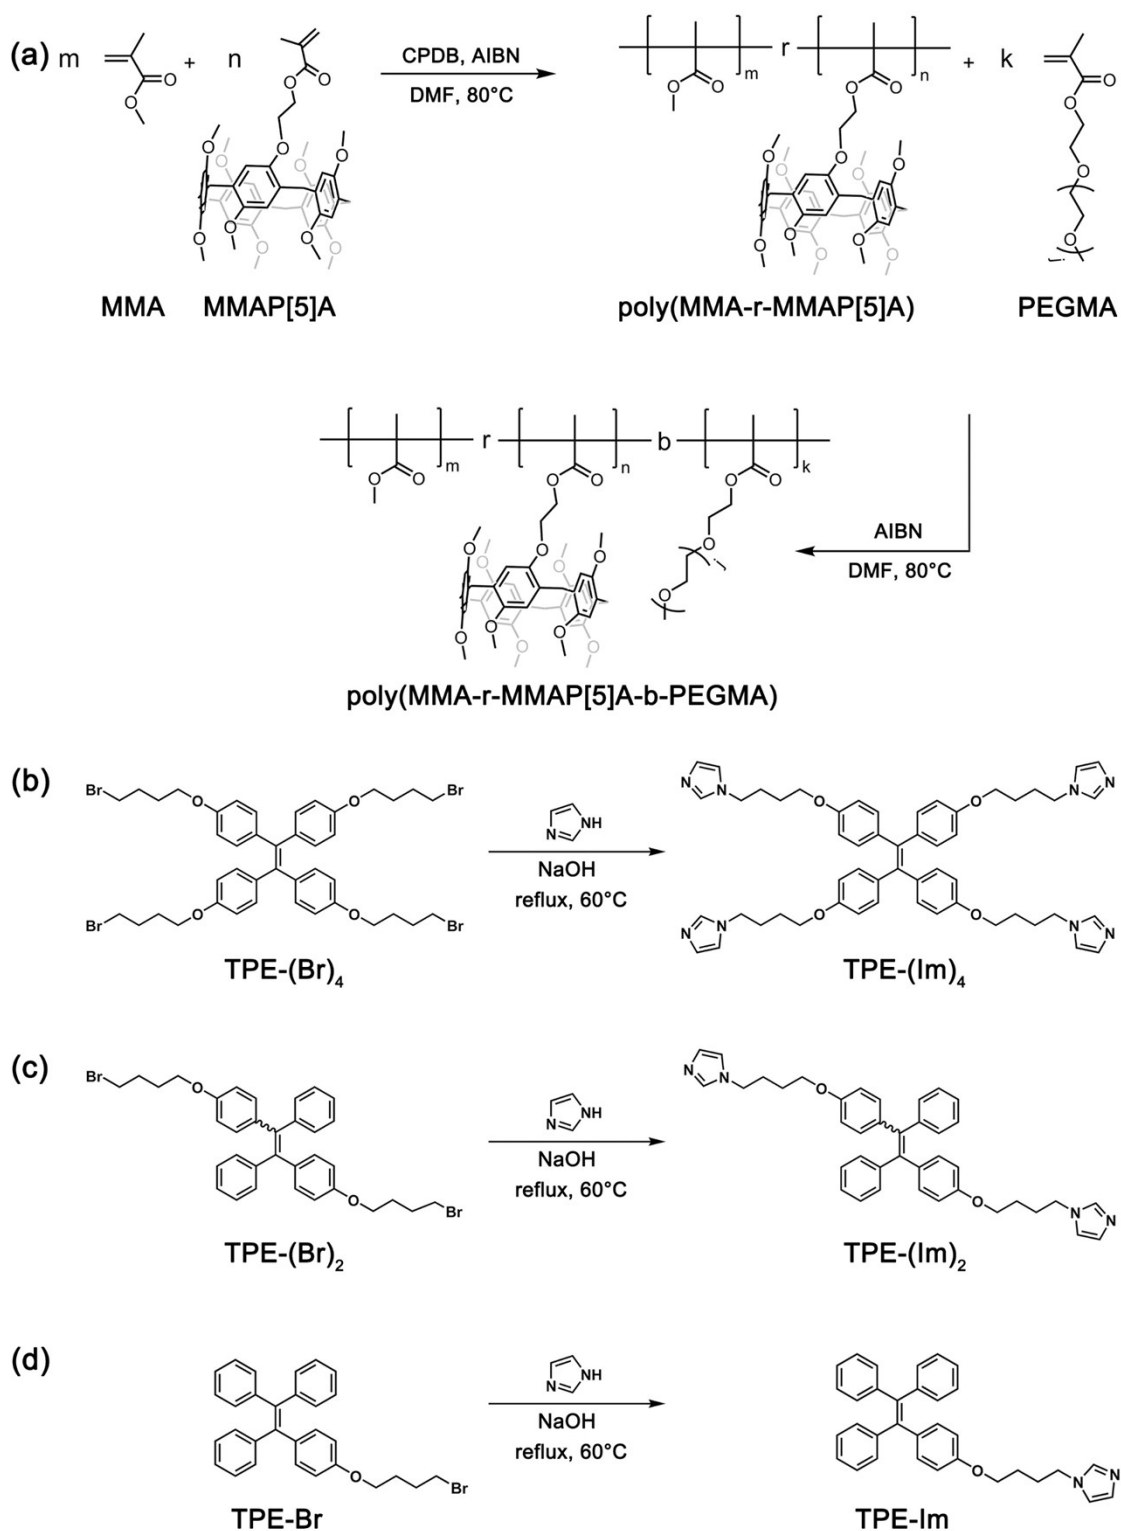

**Fig. S1.** Synthesatic routes to TPE derivatives with different number of guest moieties (TPE-(Im)<sub>4</sub>, TPE-(Im)<sub>2</sub>, TPE-Im) and amphiphilic block polymer hosts.

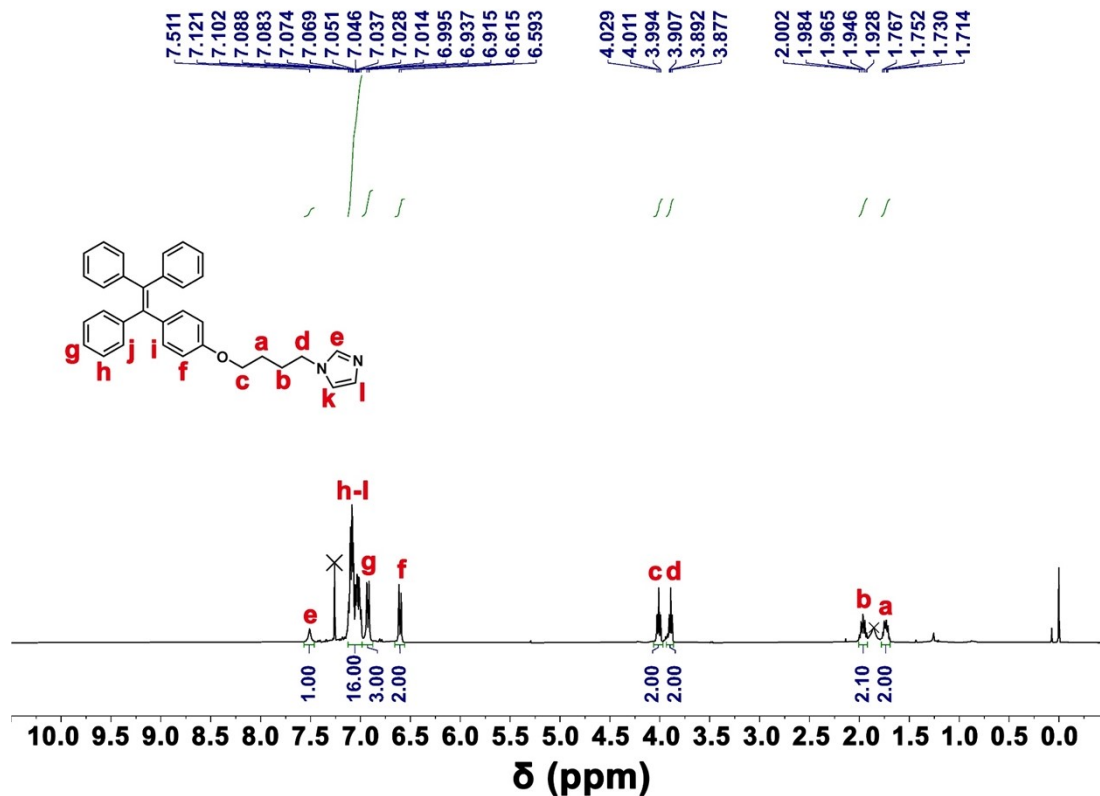

Fig. S2.  $^1\text{H}$  NMR spectrum (400 MHz,  $\text{CDCl}_3$ , 298 K) of TPE-Im.

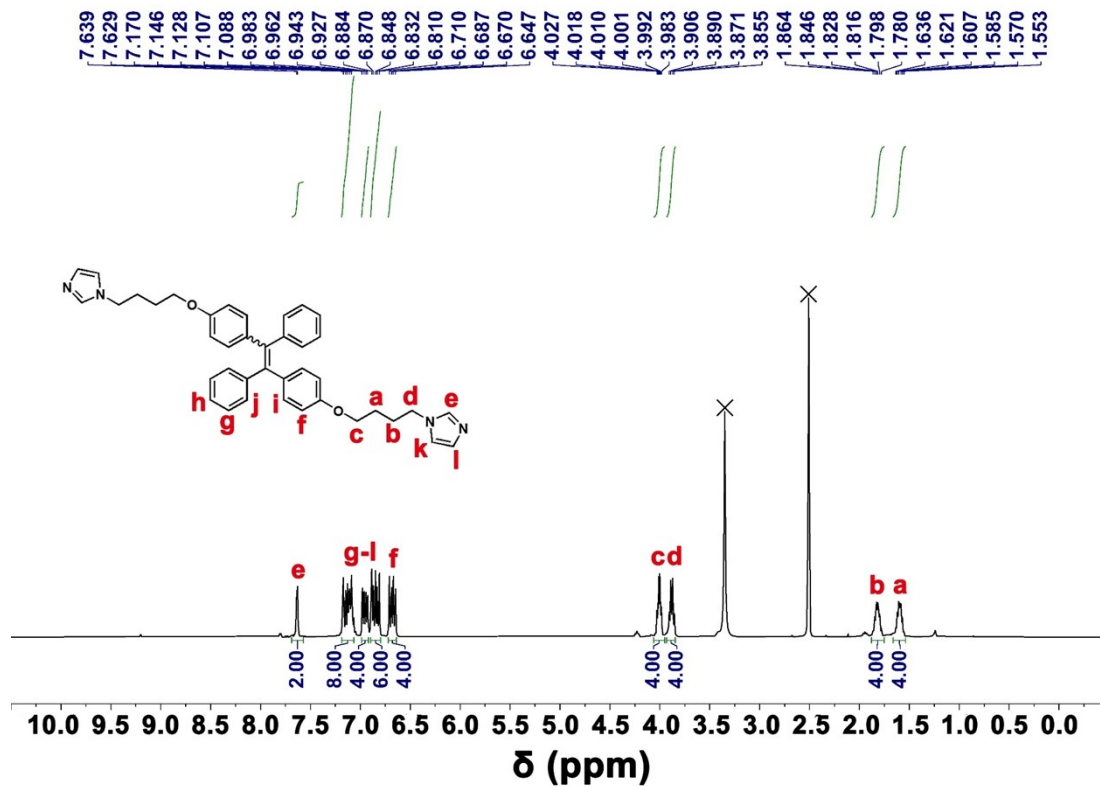

Fig. S3.  $^1\text{H}$  NMR spectrum (400 MHz,  $\text{DMSO-}d_6$ , 298 K) of TPE-(Im)<sub>2</sub>.

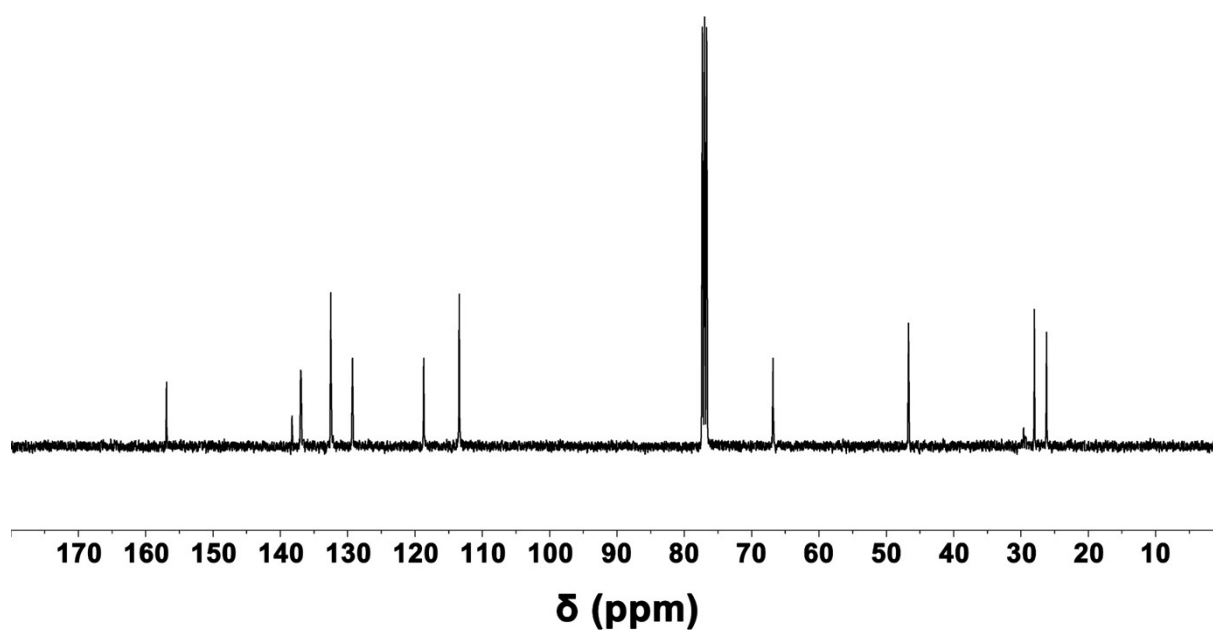

Fig. S4. <sup>13</sup>C NMR spectrum (101 MHz, CDCl<sub>3</sub>, 298 K) of TPE-(Im)<sub>2</sub>.

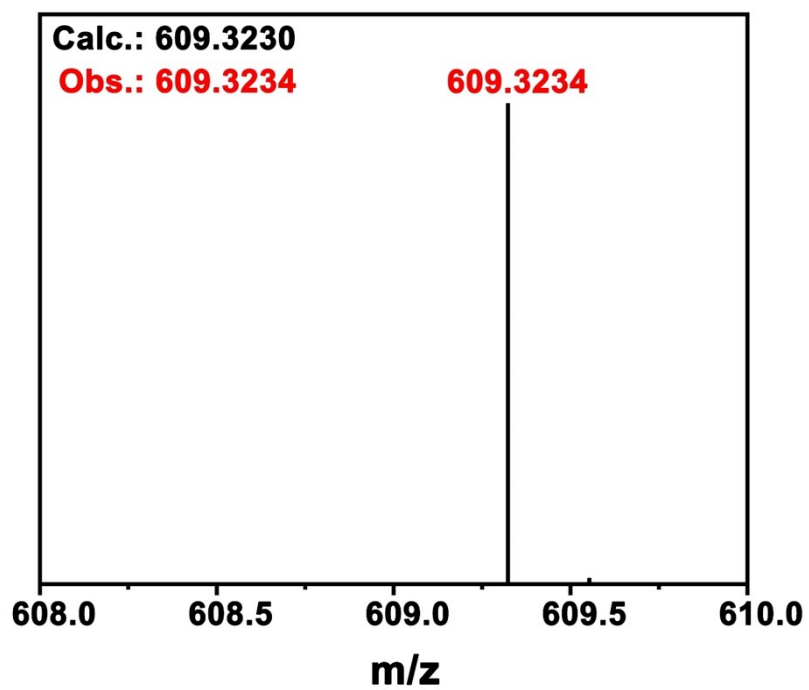

Fig. S5. HR-ESI-MS spectrum of TPE-(Im)<sub>2</sub>.

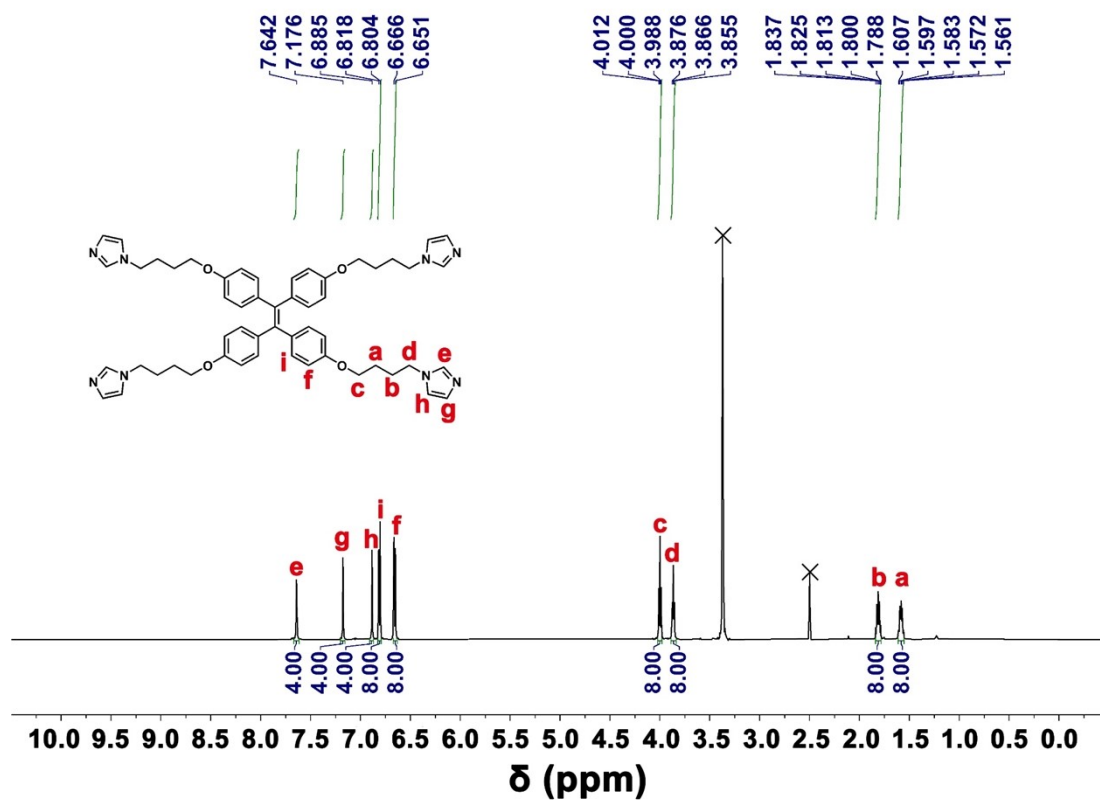

Fig. S6. <sup>1</sup>H NMR spectrum (600 MHz, DMSO-*d*<sub>6</sub>, 298 K) of TPE-(Im)<sub>4</sub>.

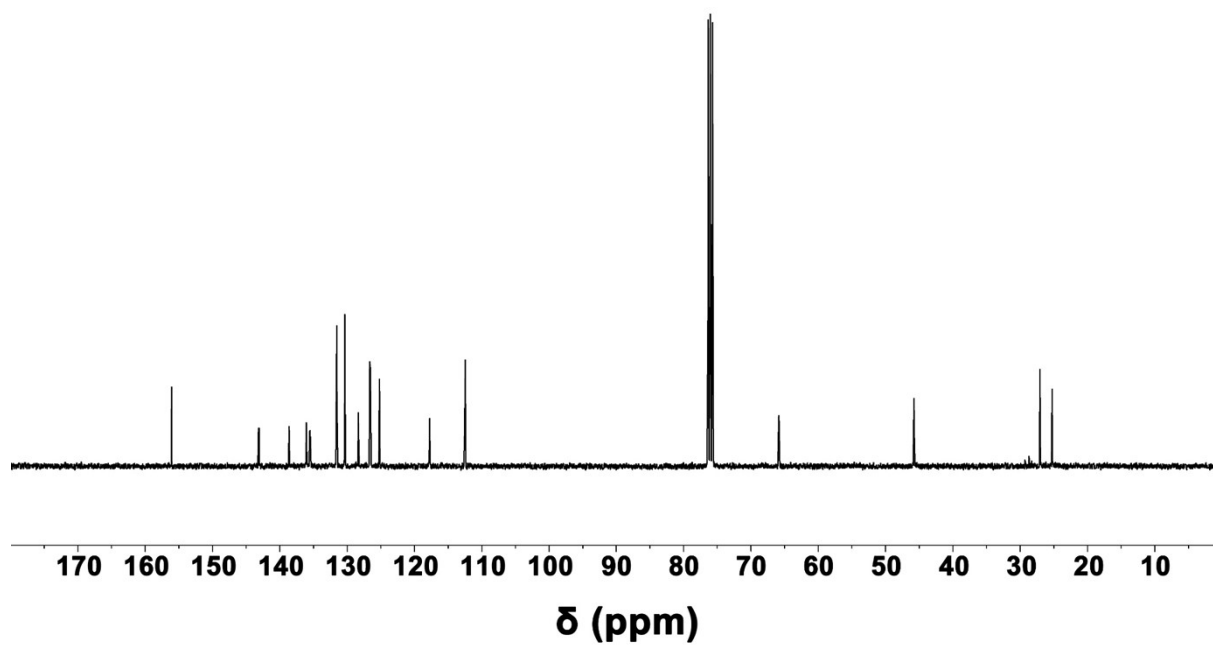

Fig. S7. <sup>13</sup>C NMR spectrum (101 MHz, CDCl<sub>3</sub>, 298 K) of TPE-(Im)<sub>4</sub>.

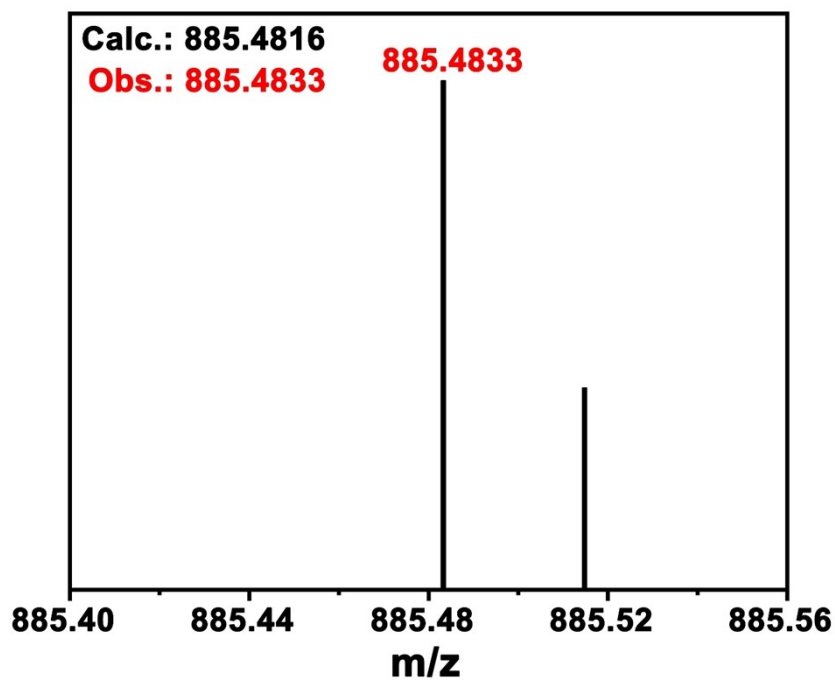

Fig. S8. HR-ESI-MS spectrum of TPE-(Im)<sub>4</sub>.

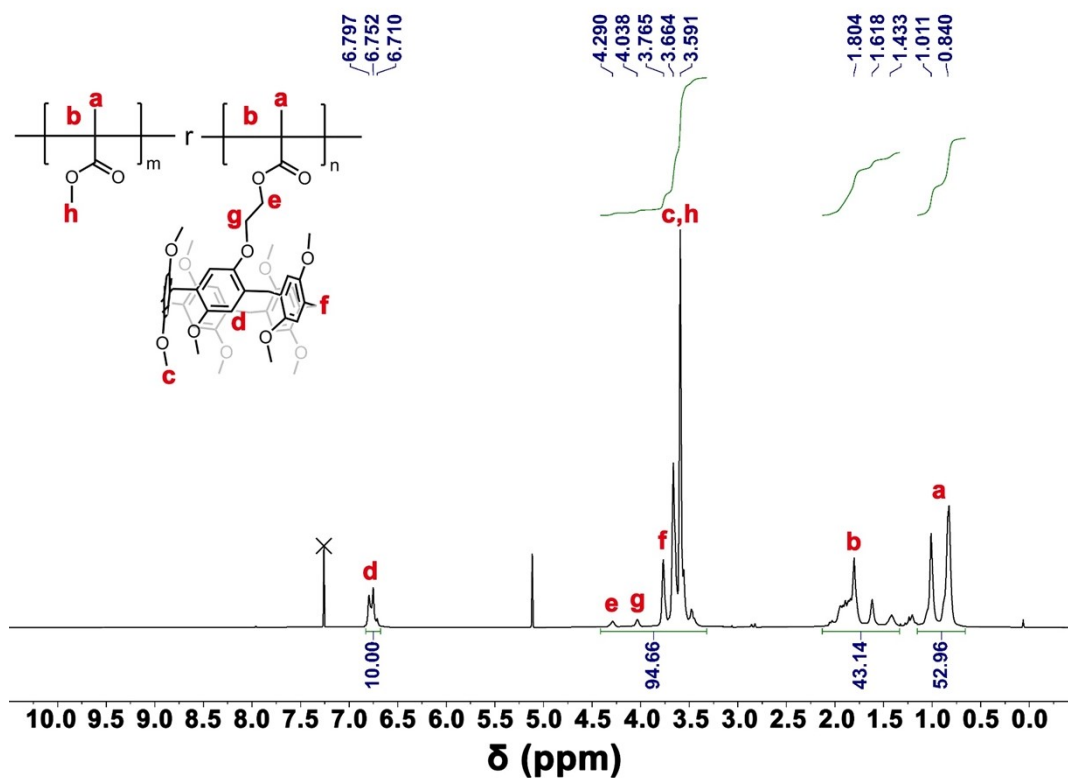

Fig. S9. <sup>1</sup>H NMR spectrum (600 MHz, CDCl<sub>3</sub>, 298 K) of PH-a.

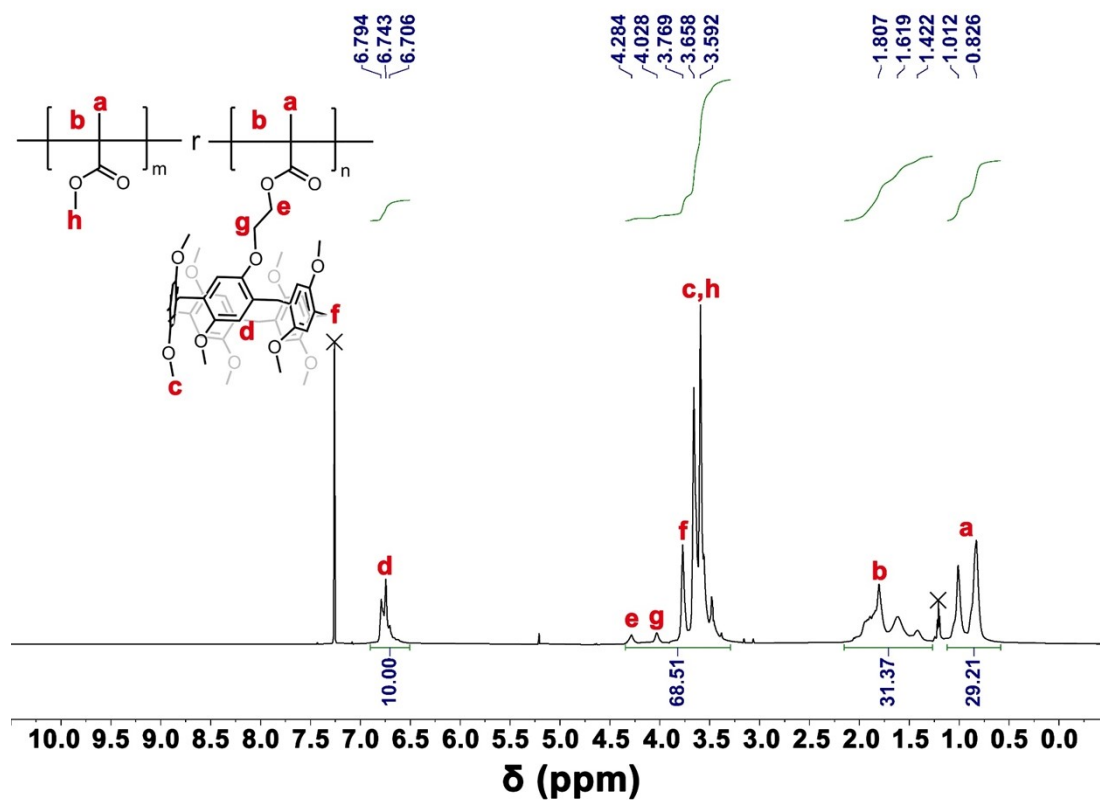

Fig. S10.  $^1\text{H}$  NMR spectrum (600 MHz,  $\text{CDCl}_3$ , 298 K) of PH-b.

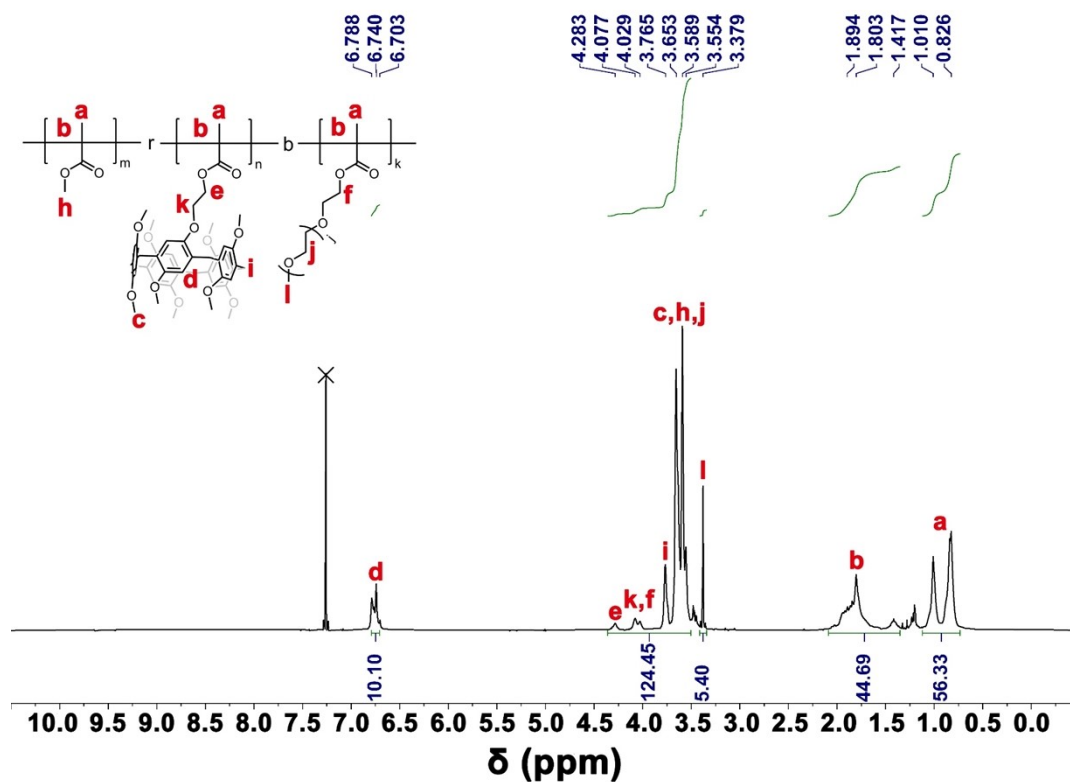

Fig. S11.  $^1\text{H}$  NMR spectrum (600 MHz,  $\text{CDCl}_3$ , 298 K) of PH1.

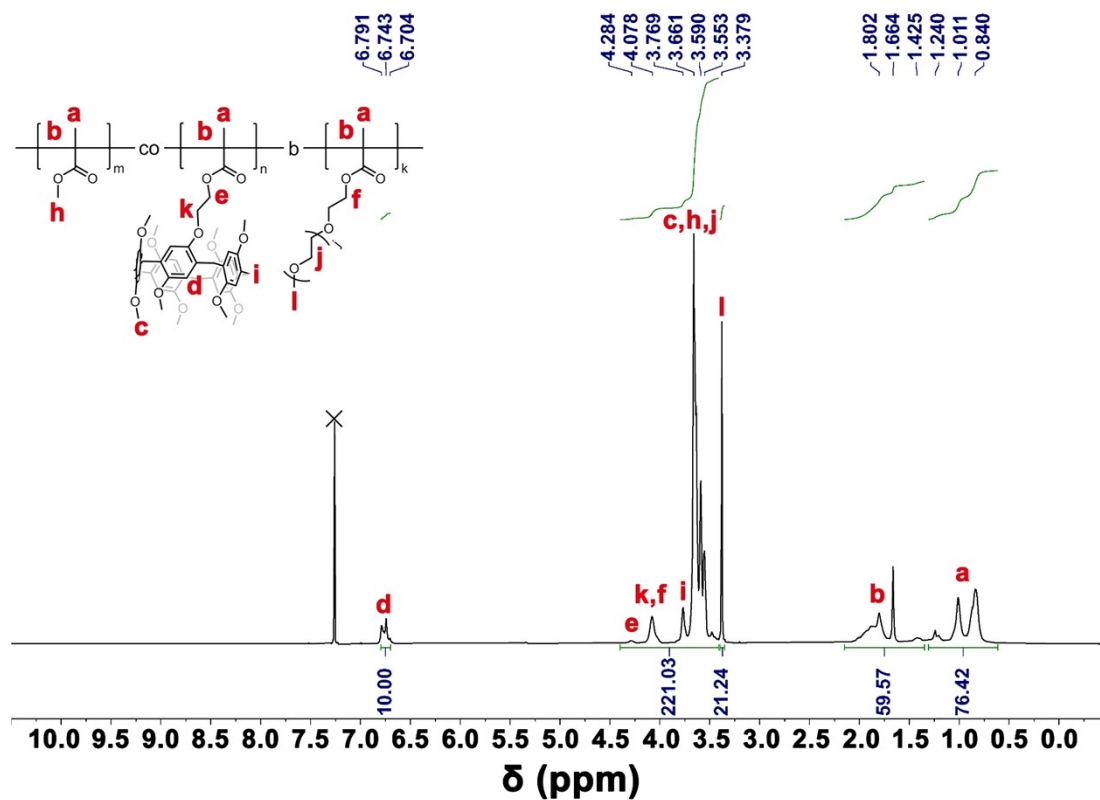

Fig. S12.  $^1\text{H}$  NMR spectrum (600 MHz,  $\text{CDCl}_3$ , 298 K) of PH2.

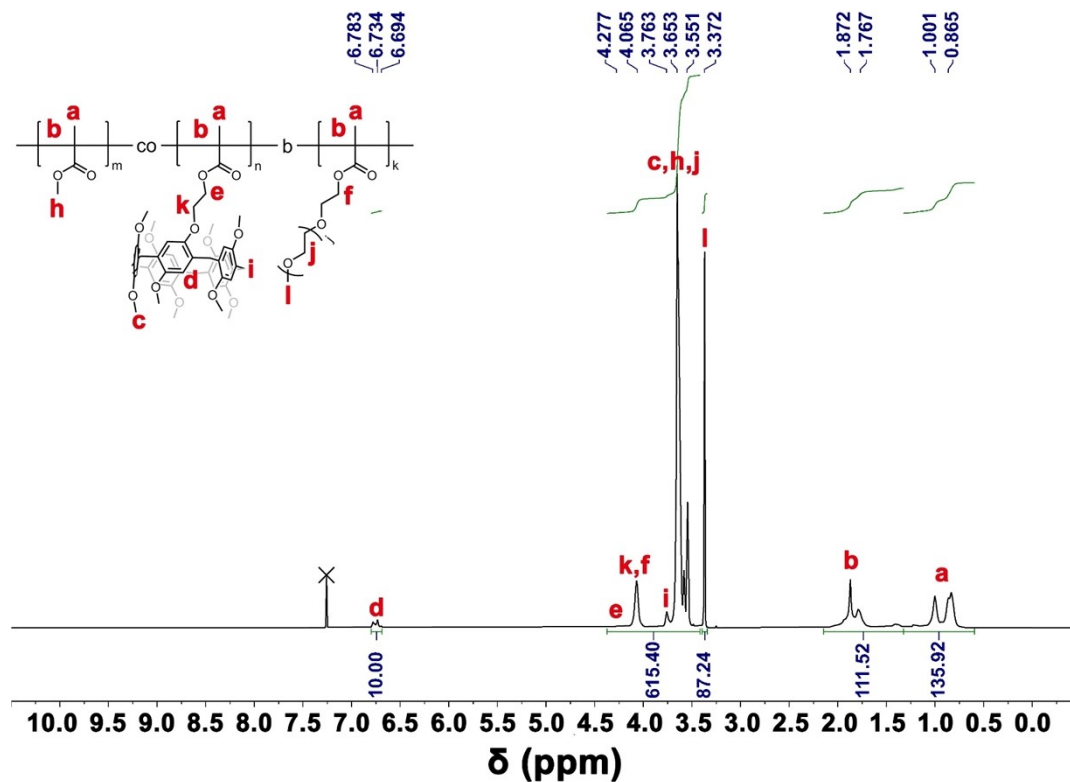

Fig. S13.  $^1\text{H}$  NMR spectrum (600 MHz,  $\text{CDCl}_3$ , 298 K) of PH3.



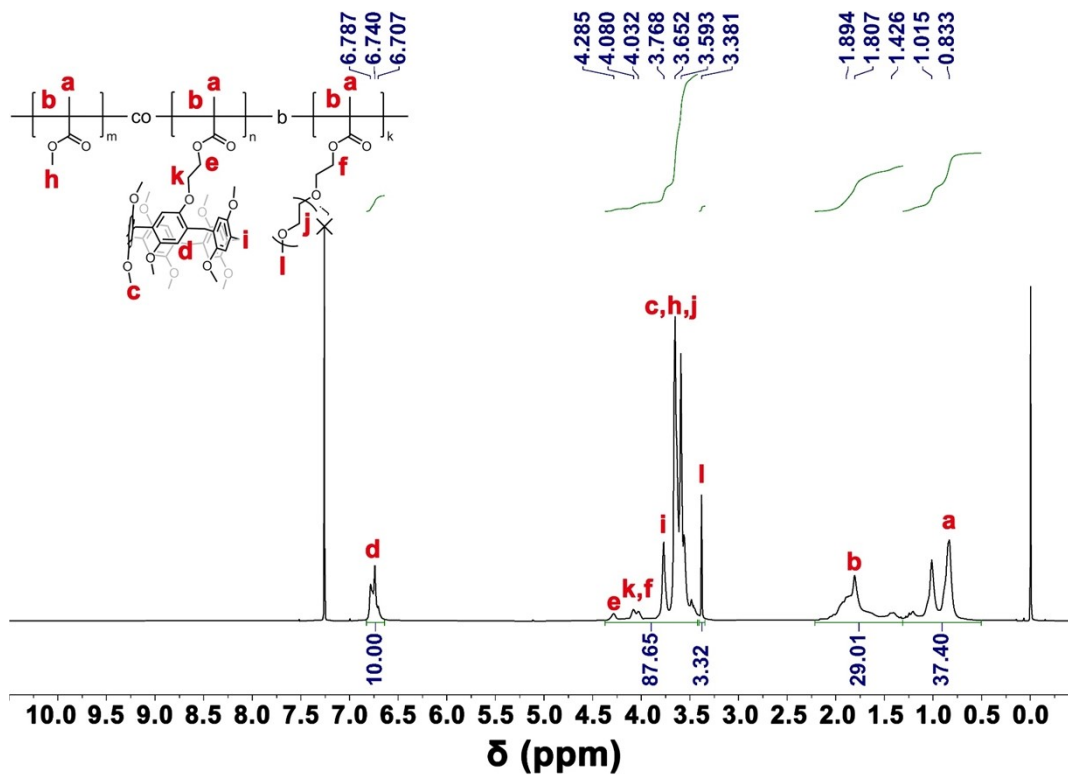

Fig. S14. <sup>1</sup>H NMR spectrum (600 MHz, CDCl<sub>3</sub>, 298 K) of PH4.

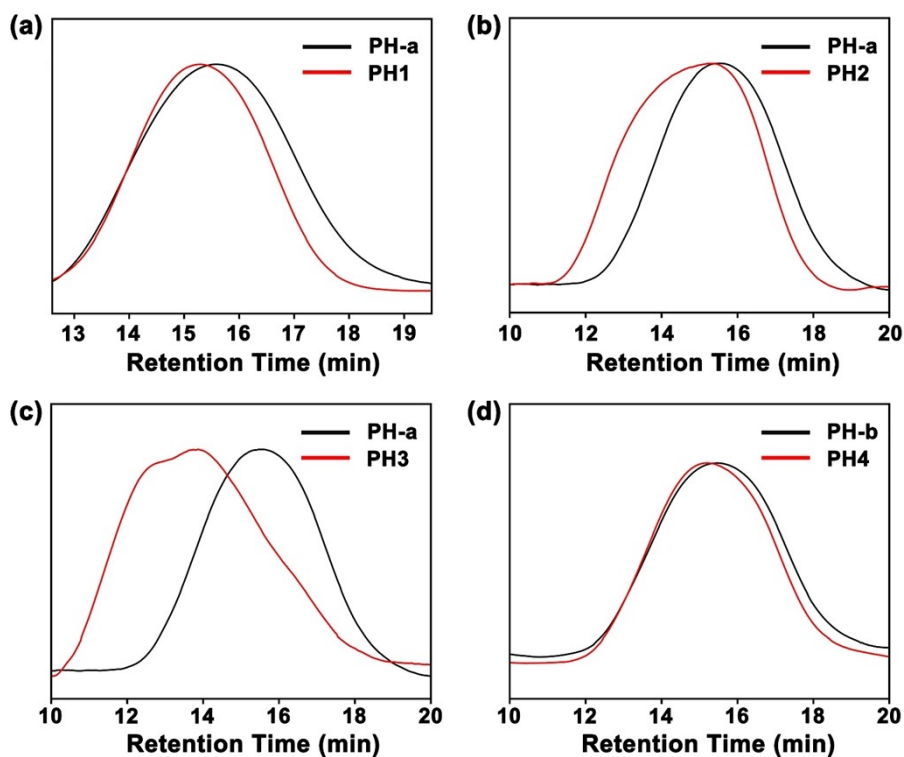

Fig. S15. (a) GPC traces of PH-a and PH1. (b) GPC traces of PH-a and PH2. (c) GPC traces of PH-a and PH3. (d) GPC traces of PH-b and PH4.

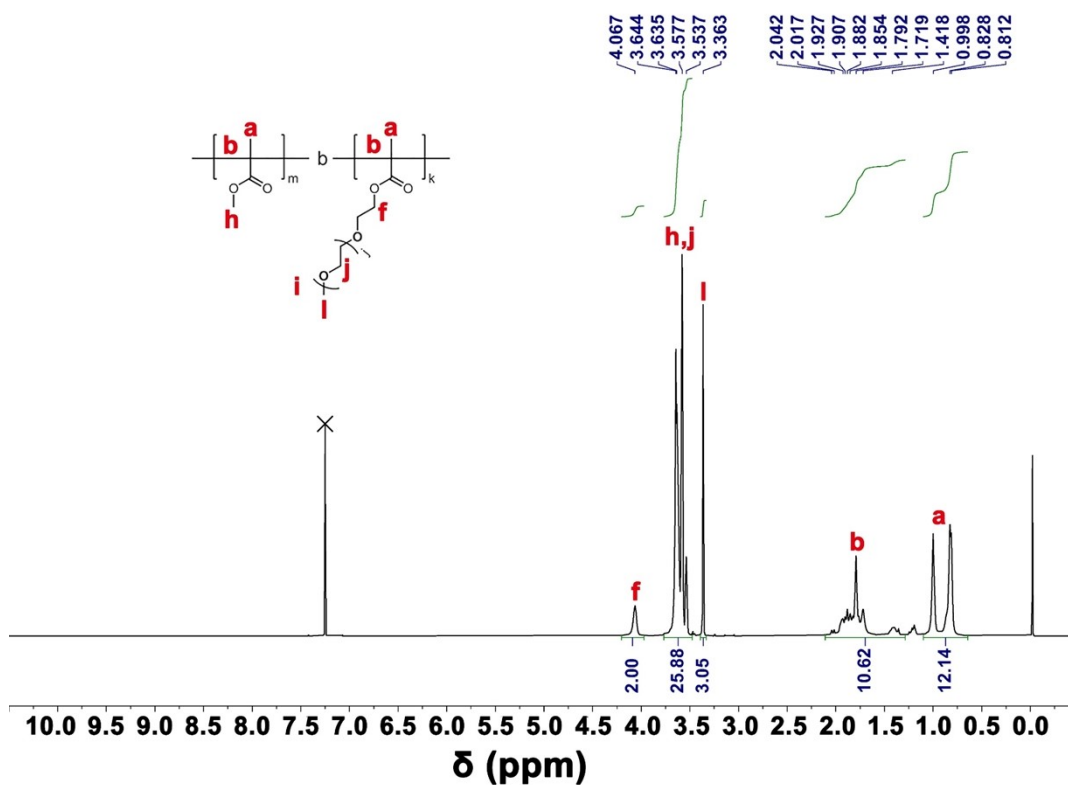

Fig. S16.  $^1\text{H}$  NMR spectrum (600 MHz,  $\text{CDCl}_3$ , 298 K) of P-c.

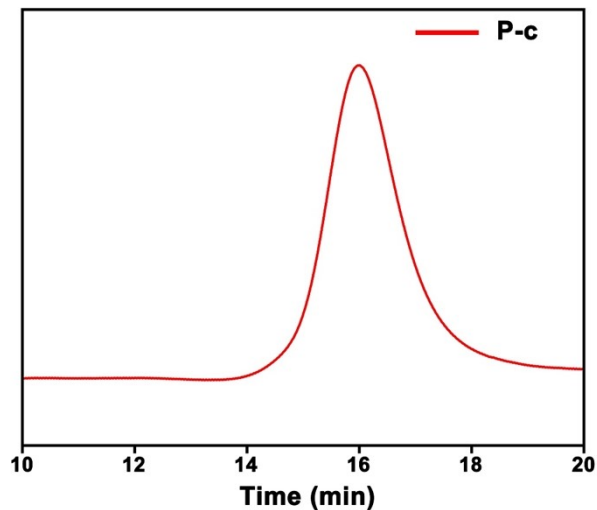

Fig. S17. GPC trace of P-c.

The ratio of repeating units in block polymer hosts was calculated by  $^1\text{H}$  NMR spectra. Taking PH1 in Fig. S11 as an example, the integral area of benzene rings ascribed to pillar[5]arene units at 6.7-6.8 ppm was determined to be 10, in the meantime, the number of repeating units of PEGMA<sub>300</sub> was calculated by the signal appeared at 3.379 ppm corresponding to methoxy groups of PEGMA<sub>300</sub> ( $5.4 \times 3^{-1} = 1.8$ ). Finally, the number of repeating unit of MMA

was calculated to be 17 by the signals appeared at 3.55-4.3 ppm. As a result, the proportion among MMA, MMAP[5]A and PEGMA<sub>300</sub> of PH1 was calculated to be 200:11:21.

Similarly, the proportion among MMA, MMAP[5]A and PEGMA<sub>300</sub> of PH2, PH3 and PH4 was calculated to be 200:11:77, 200:11:319 and 200:22:24, respectively. The ratio of MMA to MMAP[5]A of PH-a and PH-b was calculated to be 200:11 and 200:22. The ratio of MMA to PEGMA<sub>300</sub> in P-c was calculated to be 200:67.

## 2. Characterization of host-guest interactions

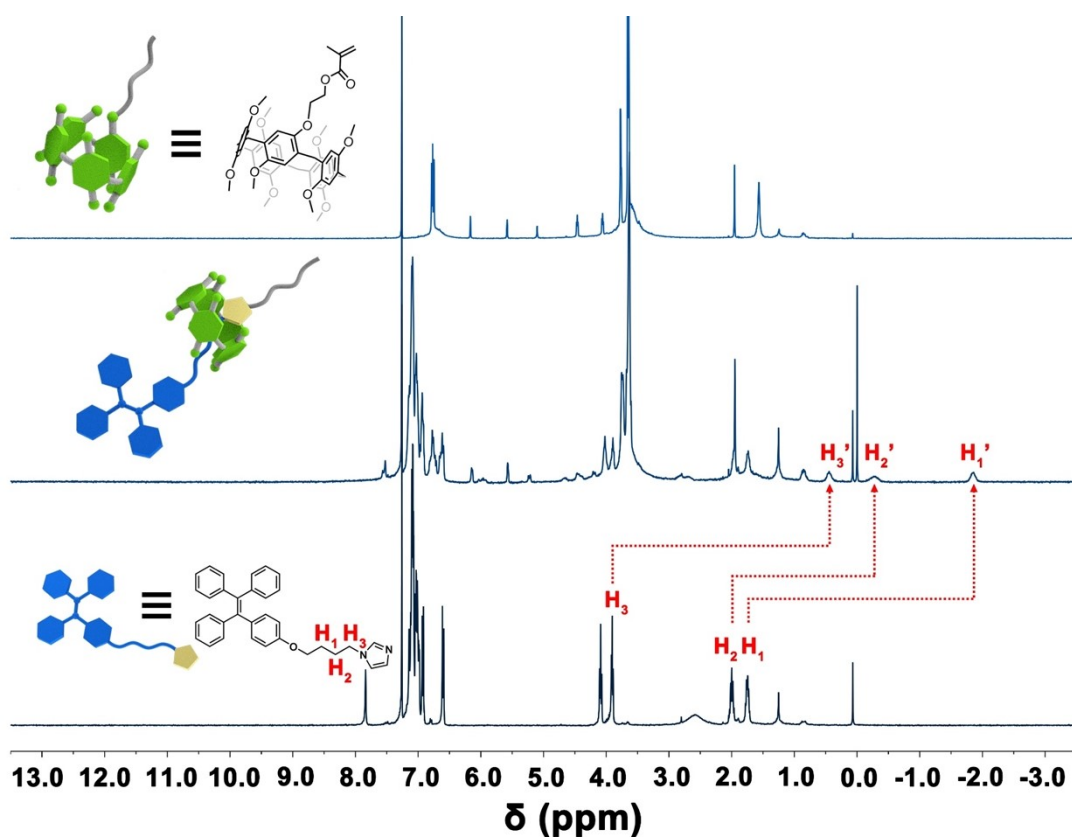

**Fig. S18.** <sup>1</sup>H NMR (600 MHz, 298 K, CDCl<sub>3</sub>) spectra of (i) MMAP[5]A ( $5 \times 10^{-3}$  M), (ii) the mixture of MMAP[5]A ( $5 \times 10^{-3}$  M), TPE-Im ( $5 \times 10^{-3}$  M), (iii) TPE-Im ( $5 \times 10^{-3}$  M).

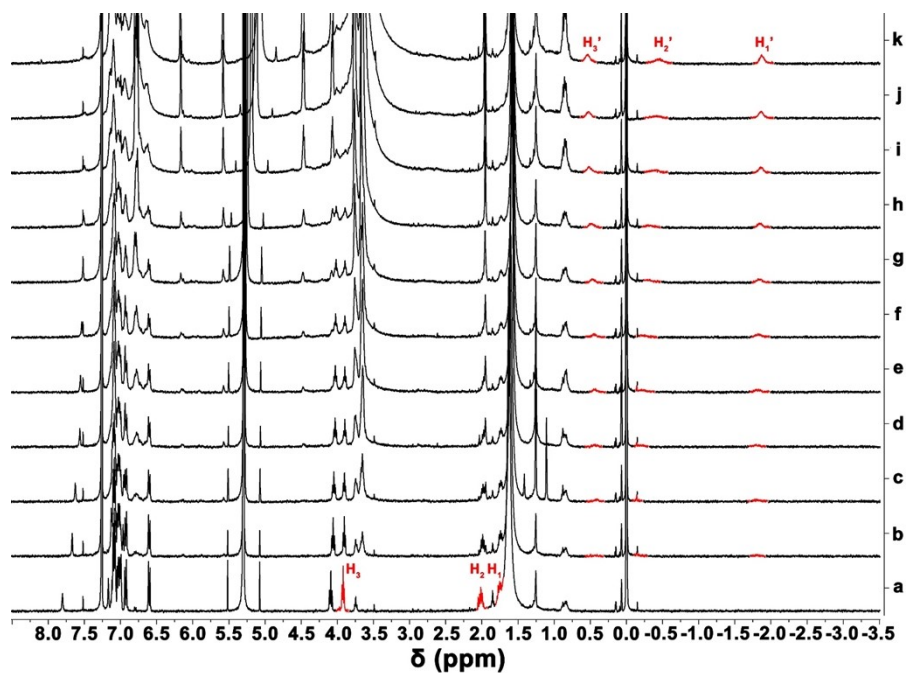

**Fig. S19.**  $^1\text{H}$  NMR spectra of TPE-Im ( $1 \times 10^{-3}$  M) upon addition of MMAP[5]A with various concentration (from bottom to top: 0, 0.2, 0.4, 0.6, 0.8, 1.0, 1.5, 2.0, 4.0, 6.0,  $10.0 \times 10^{-3}$  M).

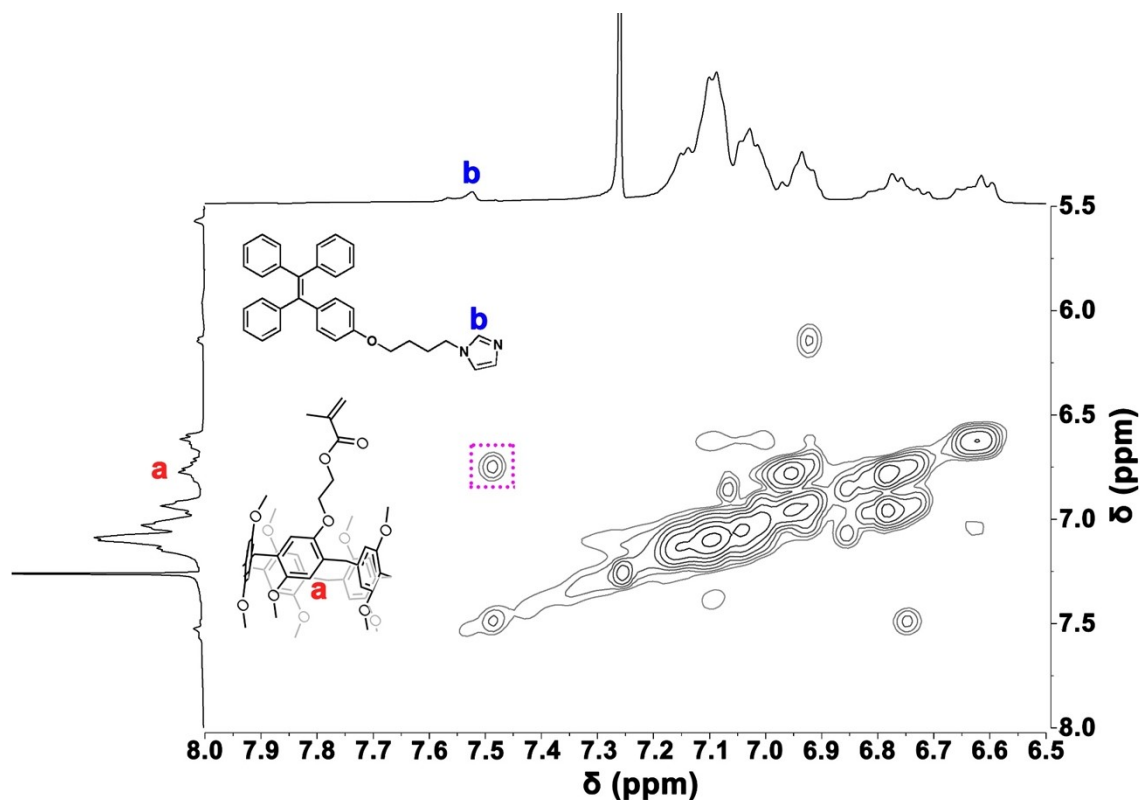

**Fig. S20.** Partial 2D NOESY spectrum (600 MHz,  $\text{CDCl}_3$ , 298 K) of TPE-Im  $\subset$  MMAP[5]A,  $[\text{MMAP}[5]\text{A}] = 3 \times 10^{-2}$  M,  $[\text{TPE-Im}] = 3 \times 10^{-2}$  M.

It was suggested that a sharp chemical shift occurred, even if the addition of MMAP[5]A was trace amount. Furthermore, the observation of complexed and uncomplexed signals of alkyl groups belonging to TPE-Im in both Figure S18 and S19 certified the slow exchange rate on NMR time scale.

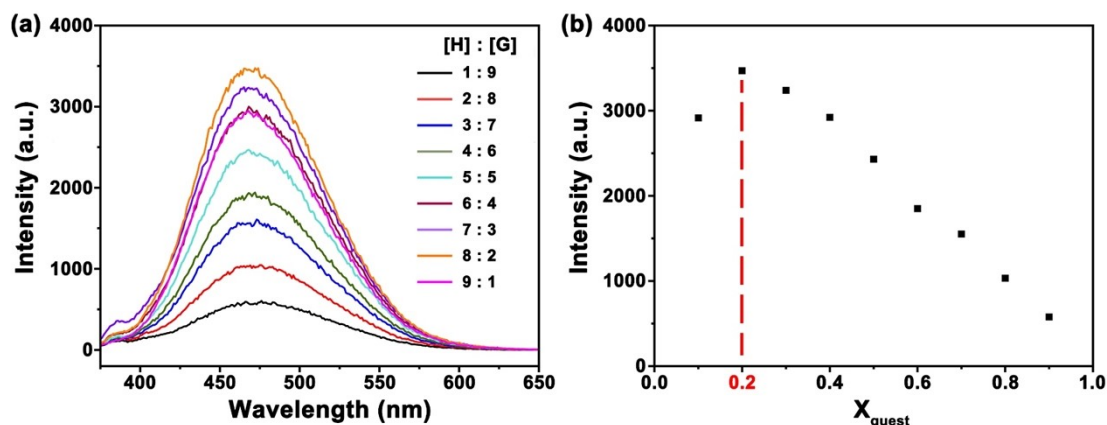

**Fig. S21.** Job's plot between PH1 and TPE-(Im)<sub>4</sub> collected by plotting fluorescence emission intensity appeared at 465 nm against the change in the molar fraction of TPE-(Im)<sub>4</sub> ( $X_{\text{guest}}$ ). H represent pillar[5]arene unit; G represent TPE-(Im)<sub>4</sub>, [pillar[5]arene unit] + [TPE-(Im)<sub>4</sub>] = 60  $\mu\text{M}$ . The plot indicates a 4:1 binding ratio between pillar[5]arene unit and TPE-(Im)<sub>4</sub>.

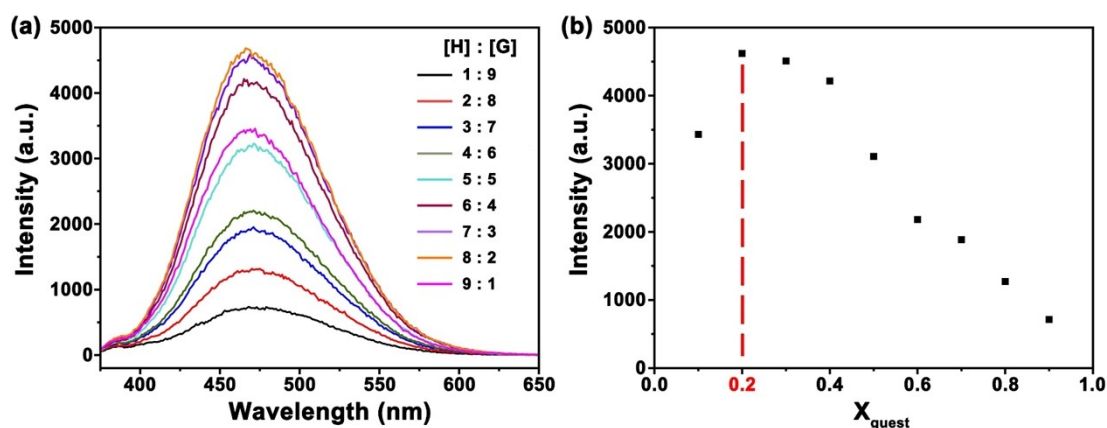

**Fig. S22.** Job's plot between PH2 and TPE-(Im)<sub>4</sub> collected by plotting fluorescence emission intensity appeared at 465 nm against the change in the molar fraction of TPE-(Im)<sub>4</sub> ( $X_{\text{guest}}$ ). H represent pillar[5]arene unit; G represent TPE-(Im)<sub>4</sub>, [pillar[5]arene unit] + [TPE-(Im)<sub>4</sub>] = 60  $\mu\text{M}$ . The plot indicates a 4:1 binding ratio between pillar[5]arene unit and TPE-(Im)<sub>4</sub>.

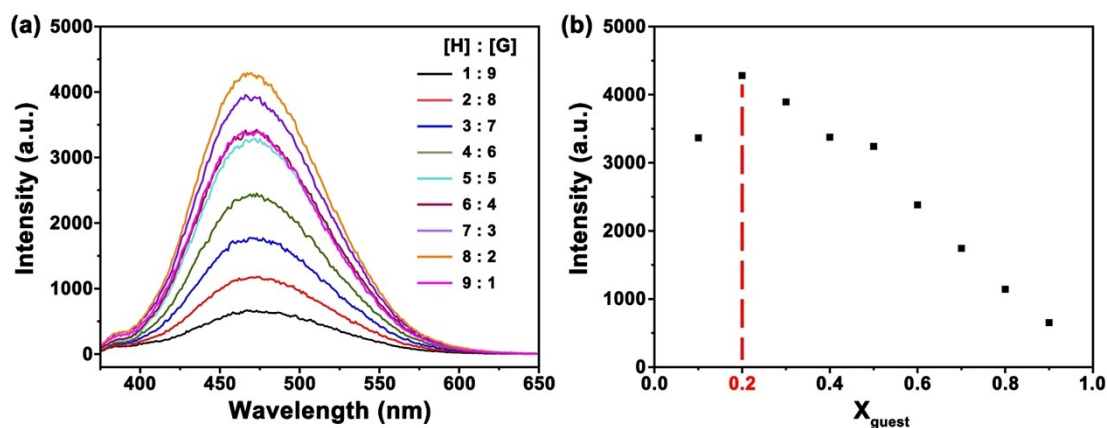

**Fig. S23.** Job's plot between PH3 and TPE-(Im)<sub>4</sub> collected by plotting fluorescence emission intensity appeared at 465 nm against the change in the molar fraction of TPE-(Im)<sub>4</sub> ( $X_{\text{guest}}$ ). H represent pillar[5]arene unit; G represent TPE-(Im)<sub>4</sub>, [pillar[5]arene unit] + [TPE-(Im)<sub>4</sub>] = 60  $\mu\text{M}$ . The plot indicates a 4:1 binding ratio between pillar[5]arene unit and TPE-(Im)<sub>4</sub>.

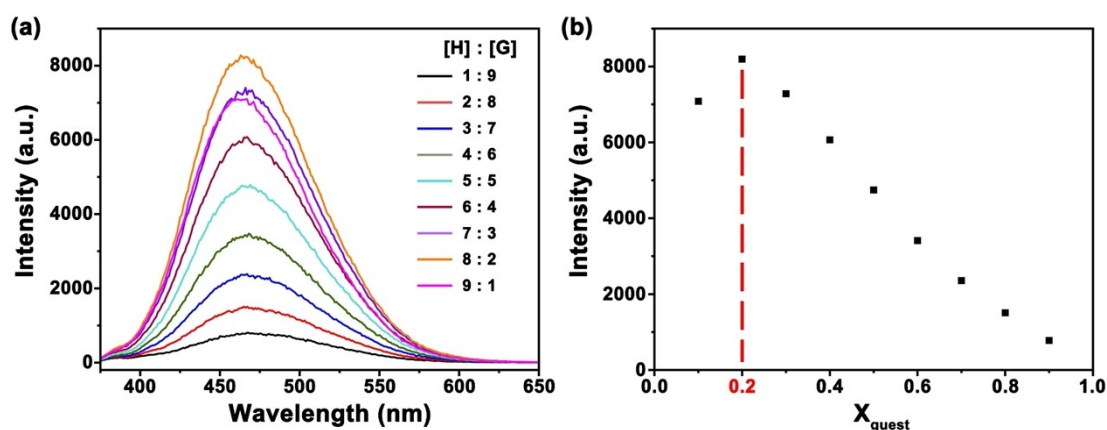

**Fig. S24.** Job's plot between PH4 and TPE-(Im)<sub>4</sub> collected by plotting fluorescence emission intensity appeared at 465 nm against the change in the molar fraction of TPE-(Im)<sub>4</sub> ( $X_{\text{guest}}$ ). H represent pillar[5]arene unit; G represent TPE-(Im)<sub>4</sub>, [pillar[5]arene unit] + [TPE-(Im)<sub>4</sub>] = 60  $\mu\text{M}$ . The plot indicates a 4:1 binding ratio between pillar[5]arene unit and TPE-(Im)<sub>4</sub>.

### 3. Fluorescence enhancement of supramolecular networks

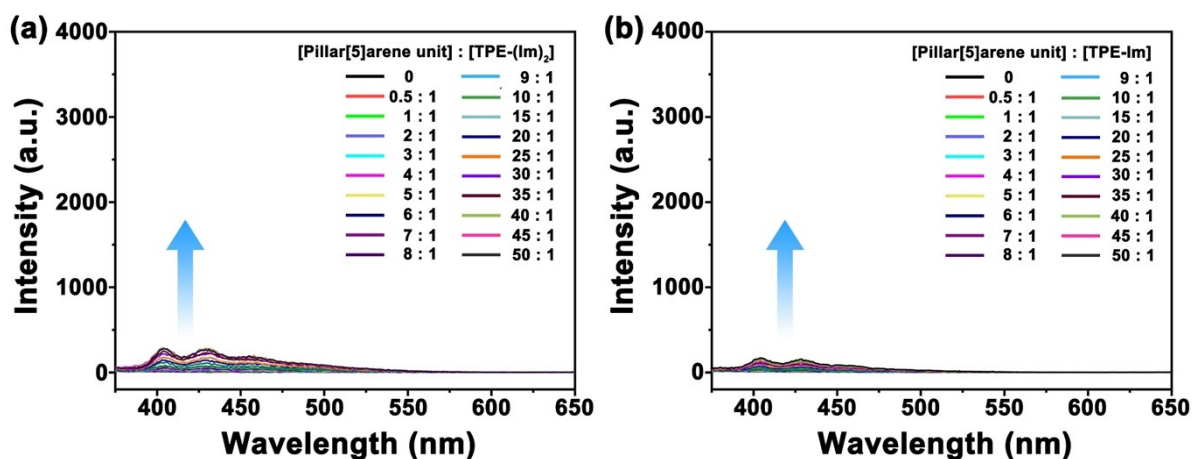

**Fig. S25.** Fluorescence emission spectra of (a) TPE-(Im)<sub>2</sub> ⊂ PH<sub>4</sub>, (b) TPE-Im ⊂ PH<sub>4</sub> in THF solution. ( $\lambda_{\text{ex}} = 330 \text{ nm}$ ; [TPE-(Im)<sub>2</sub>] =  $1 \times 10^{-6} \text{ M}$ , [TPE-Im] =  $1 \times 10^{-6} \text{ M}$ , [pillar[5]arene unit] = 0, 0.5, 1, 2, 3, 4, 5, 6, 7, 8, 9, 10, 15, 20, 25, 30, 35, 40, 45,  $50 \times 10^{-6} \text{ M}$ ).

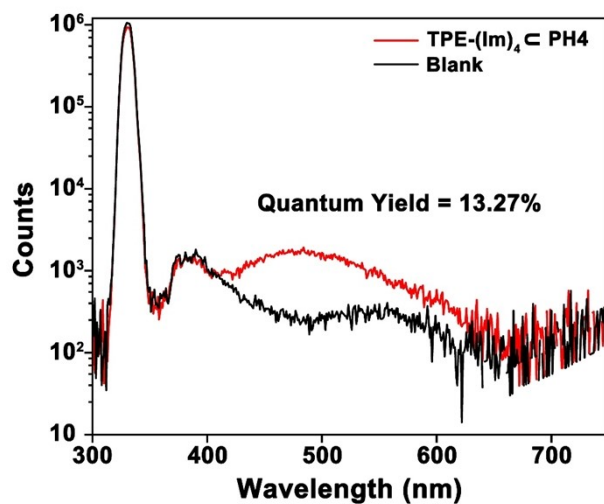

**Fig. S26.** Absolute fluorescence quantum yield of TPE-(Im)<sub>4</sub> ⊂ PH<sub>4</sub> in THF solution. Experimental conditions:  $\lambda_{\text{ex}} = 330 \text{ nm}$ ; [pillar[5]arene unit] =  $10 \mu\text{M}$ ; [TPE-(Im)<sub>4</sub>] =  $1 \mu\text{M}$ ; 25 °C.

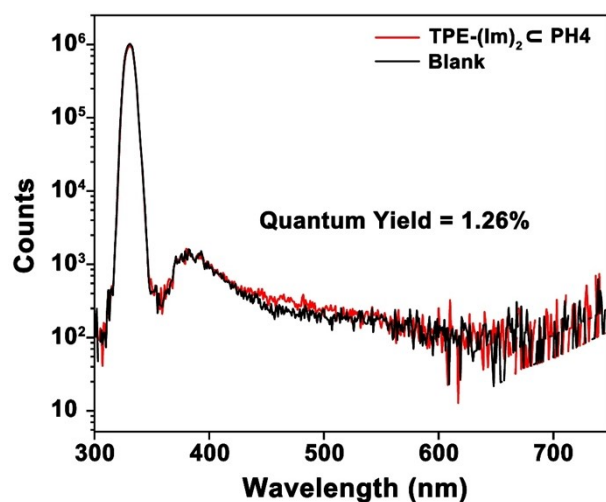

**Fig. S27.** Absolute fluorescence quantum yield of TPE-(Im)<sub>2</sub> c PH4 in THF solution. Experimental conditions:  $\lambda_{\text{ex}} = 330$  nm; [pillar[5]arene unit] = 10  $\mu\text{M}$ ; [TPE-(Im)<sub>2</sub>] = 1  $\mu\text{M}$ ; 25 °C.

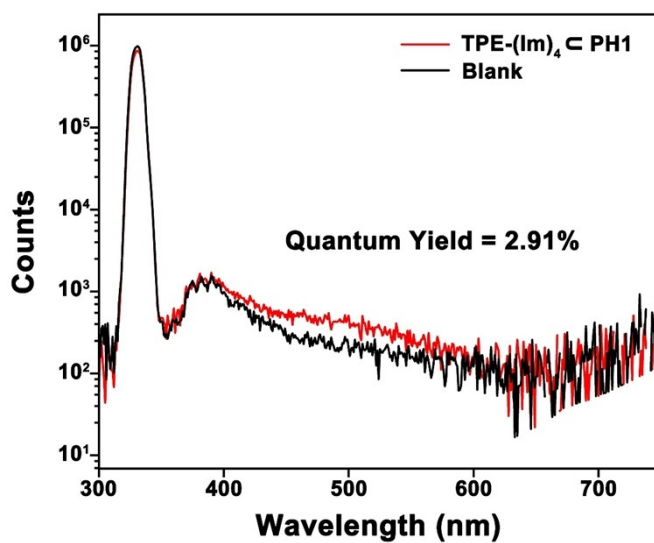

**Fig. S28.** Absolute fluorescence quantum yield of TPE-(Im)<sub>4</sub> c PH1 in THF solution. Experimental conditions:  $\lambda_{\text{ex}} = 330$  nm; [pillar[5]arene unit] = 10  $\mu\text{M}$ ; [TPE-(Im)<sub>4</sub>] = 1  $\mu\text{M}$ ; 25 °C.



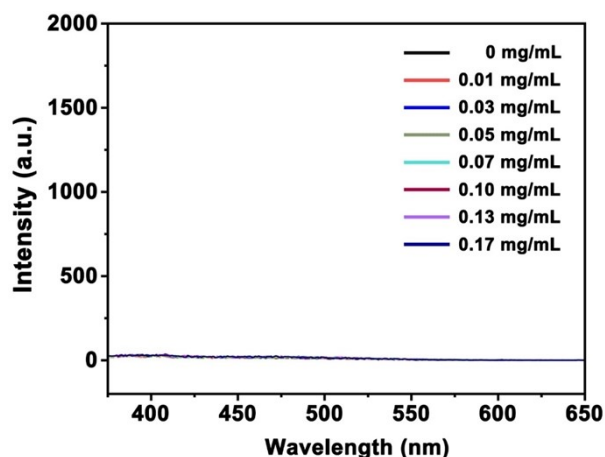

Fig. S29. Fluorescence intensities of TPE-(Im)<sub>4</sub> upon addition of P-c with different concentration in THF. The weight concentration of P-c was equal to PH2 by calculation.

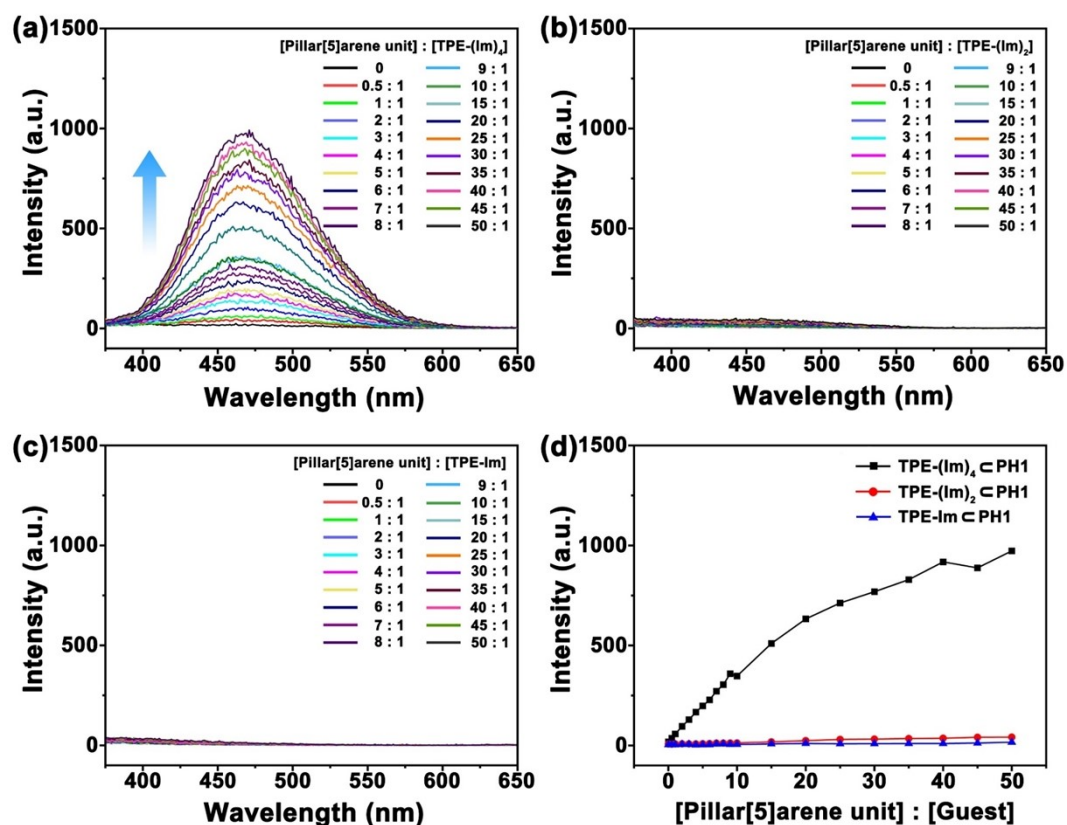

Fig. S30. Fluorescence emission spectra of (a) TPE-(Im)<sub>4</sub> c PH1, (b) TPE-(Im)<sub>2</sub> c PH1 and (c) TPE-Im c PH1 in THF solution. ( $\lambda_{\text{ex}} = 330 \text{ nm}$ ;  $25 \text{ }^\circ\text{C}$ ;  $[\text{TPE}-(\text{Im})_4] = 1 \times 10^{-6} \text{ M}$ ,  $[\text{TPE}-(\text{Im})_2] = 1 \times 10^{-6} \text{ M}$ ,  $[\text{TPE-Im}] = 1 \times 10^{-6} \text{ M}$ ,  $[\text{pillar}[5]\text{arene unit}] = 0, 0.5, 1, 2, 3, 4, 5, 6, 7, 8, 9, 10, 15, 20, 25, 30, 35, 40, 45, 50 \times 10^{-6} \text{ M}$ ). (d) Line chart of fluorescence emission intensities of

TPE-(Im)<sub>4</sub> ⊂ PH1 (black line), TPE-(Im)<sub>2</sub> ⊂ PH1 (red line) and TPE-Im ⊂ PH1 (blue line) appeared at 465 nm with different ratio of pillar[5]arene units to guest molecules.

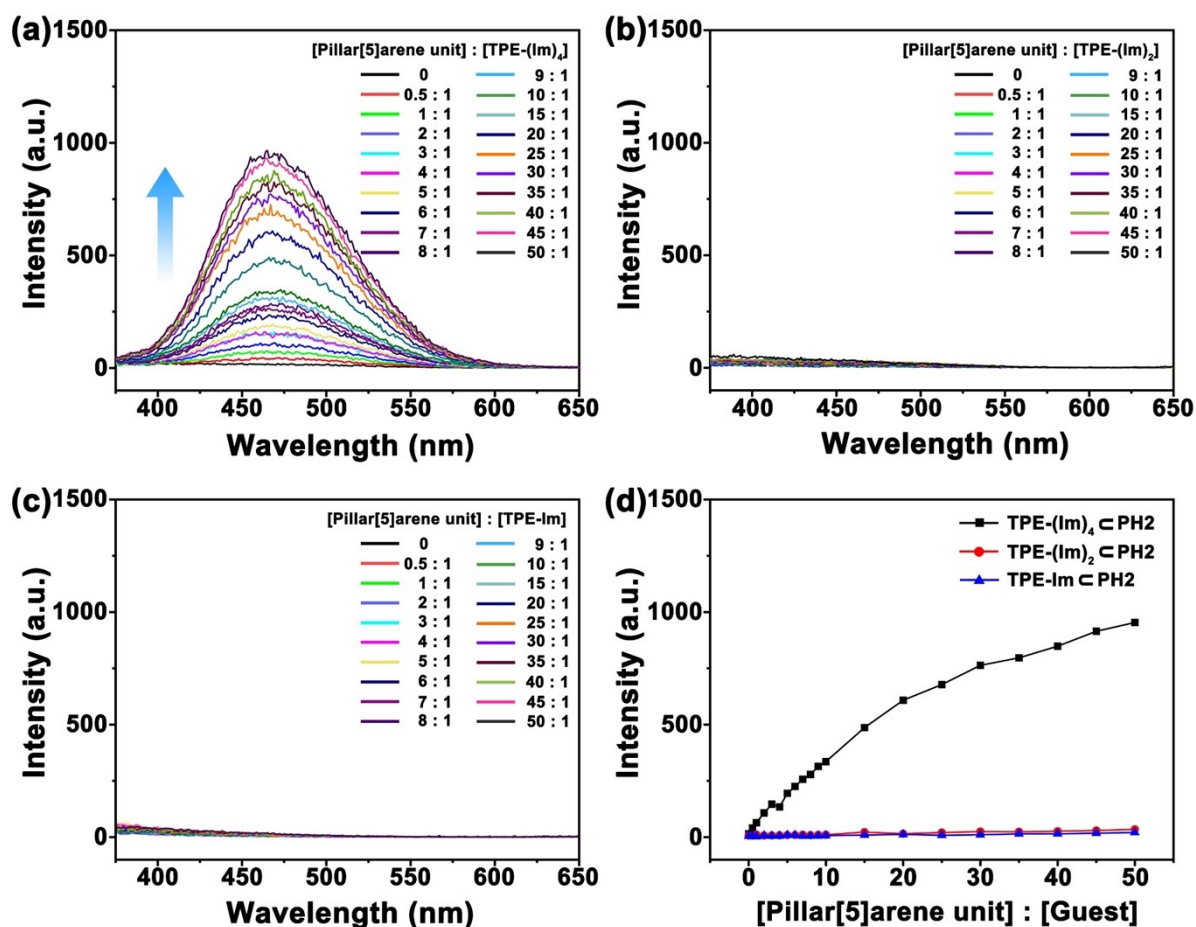

**Fig. S31.** Fluorescence emission spectra of (a) TPE-(Im)<sub>4</sub> ⊂ PH2, (b) TPE-(Im)<sub>2</sub> ⊂ PH2 and (c) TPE-Im ⊂ PH2 in THF solution. ( $\lambda_{\text{ex}} = 330 \text{ nm}$ ;  $25 \text{ }^\circ\text{C}$ ;  $[\text{TPE}-(\text{Im})_4] = 1 \times 10^{-6} \text{ M}$ ,  $[\text{TPE}-(\text{Im})_2] = 1 \times 10^{-6} \text{ M}$ ,  $[\text{TPE-Im}] = 1 \times 10^{-6} \text{ M}$ ,  $[\text{pillar}[5]\text{arene unit}] = 0, 0.5, 1, 2, 3, 4, 5, 6, 7, 8, 9, 10, 15, 20, 25, 30, 35, 40, 45, 50 \times 10^{-6} \text{ M}$ ). (d) Line chart of fluorescence emission intensities of TPE-(Im)<sub>4</sub> ⊂ PH2 (black line), TPE-(Im)<sub>2</sub> ⊂ PH2 (red line) and TPE-Im ⊂ PH2 (blue line) appeared at 465 nm with different ratio of pillar[5]arene units and guest molecules.

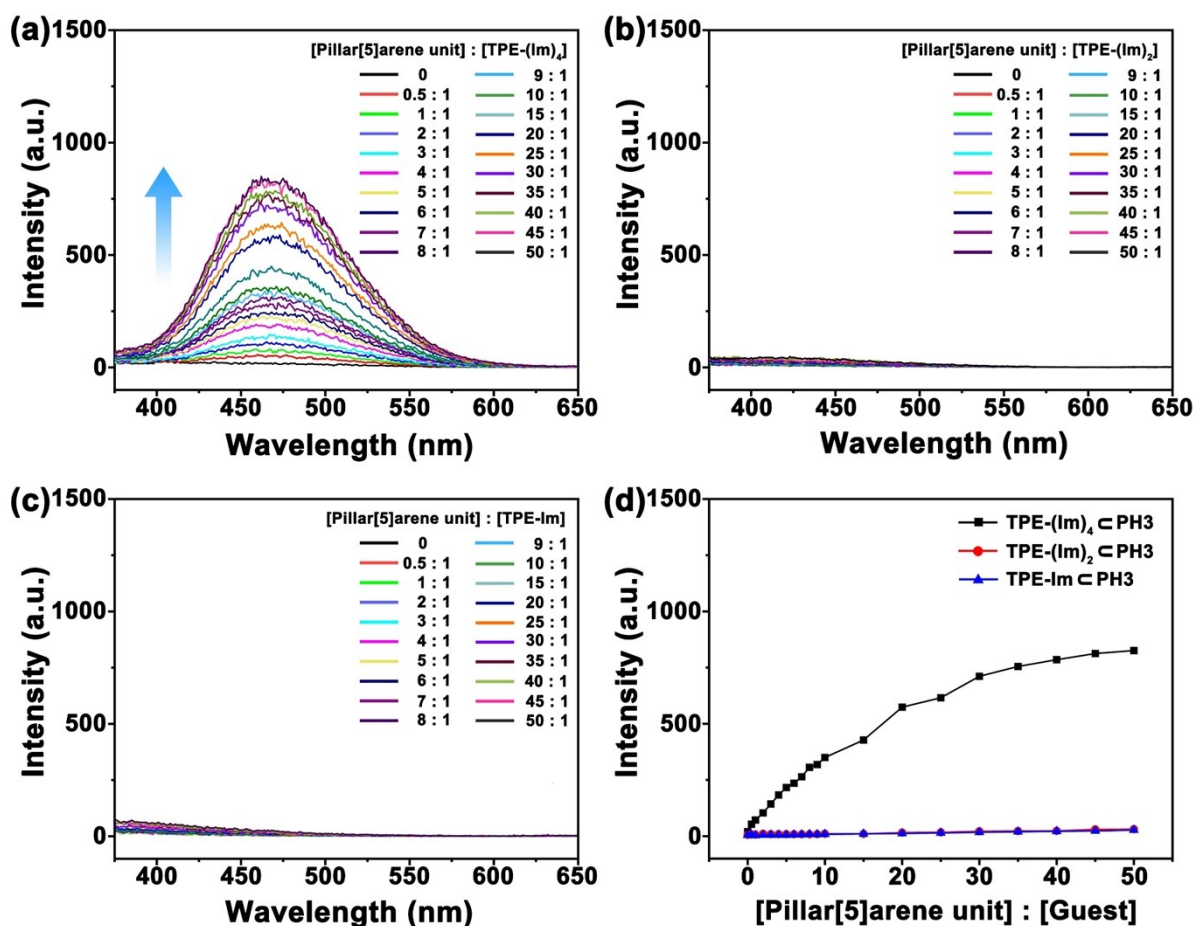

**Fig. S32.** Fluorescence emission spectra of (a) TPE-(Im)<sub>4</sub> c PH<sub>3</sub>, (b) TPE-(Im)<sub>2</sub> c PH<sub>3</sub> and (c) TPE-Im c PH<sub>3</sub> in THF solution. ( $\lambda_{\text{ex}} = 330 \text{ nm}$ ;  $25 \text{ }^\circ\text{C}$ ;  $[\text{TPE}-(\text{Im})_4] = 1 \times 10^{-6} \text{ M}$ ,  $[\text{TPE}-(\text{Im})_2] = 1 \times 10^{-6} \text{ M}$ ,  $[\text{TPE-Im}] = 1 \times 10^{-6} \text{ M}$ ,  $[\text{pillar}[5]\text{arene unit}] = 0, 0.5, 1, 2, 3, 4, 5, 6, 7, 8, 9, 10, 15, 20, 25, 30, 35, 40, 45, 50 \times 10^{-6} \text{ M}$ ). (d) Line chart of fluorescence emission intensities of TPE-(Im)<sub>4</sub> c PH<sub>3</sub> (black line), TPE-(Im)<sub>2</sub> c PH<sub>3</sub> (red line) and TPE-Im c PH<sub>3</sub> (blue line) appeared at 465 nm with different ratio of pillar[5]arene units and guest molecules.

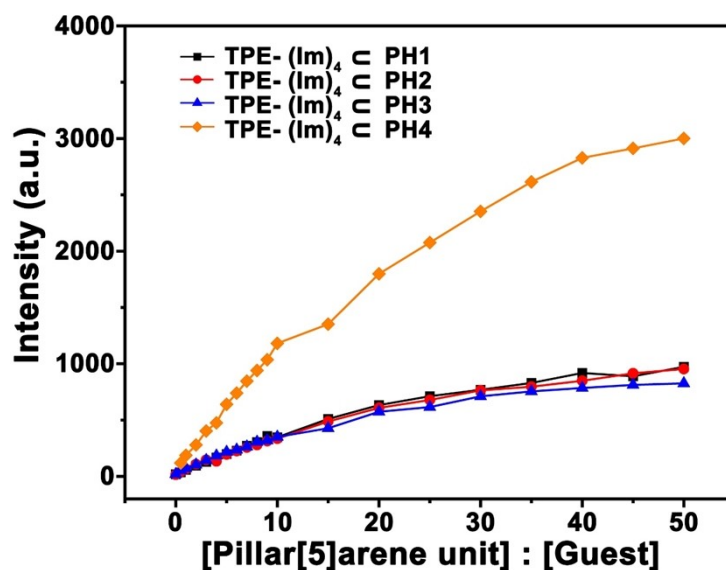

**Fig. S33.** (a) Fluorescence intensities of TPE-(Im)<sub>4</sub> ⊂ PH1 (black line), TPE-(Im)<sub>4</sub> ⊂ PH2 (red line), TPE-(Im)<sub>4</sub> ⊂ PH3 (blue line) and TPE-(Im)<sub>4</sub> ⊂ PH4 (orange line) appeared at 465 nm.

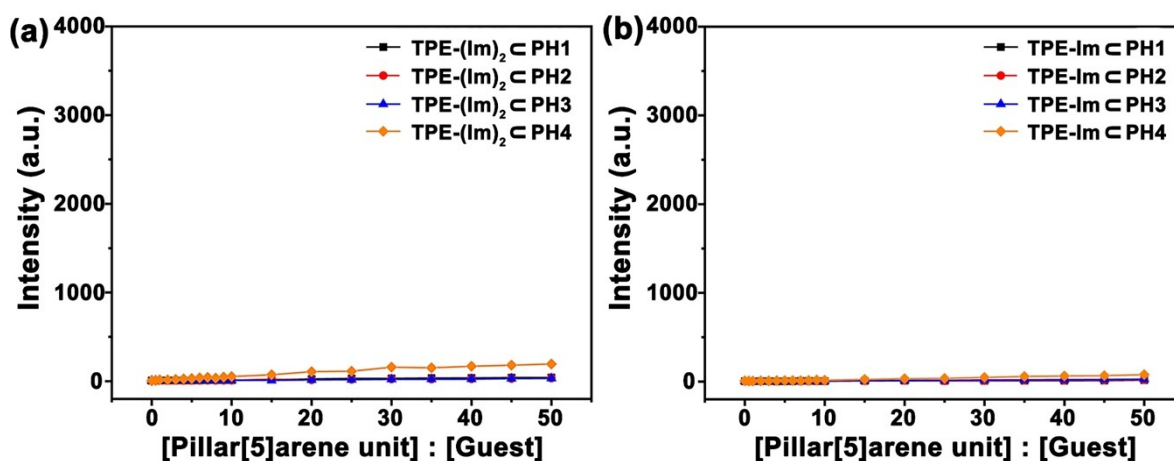

**Fig. S34.** (a) Fluorescence intensities of TPE-(Im)<sub>2</sub> ⊂ PH1 (black line), TPE-(Im)<sub>2</sub> ⊂ PH2 (red line), TPE-(Im)<sub>2</sub> ⊂ PH3 (blue line) and TPE-(Im)<sub>2</sub> ⊂ PH4 (orange line) at 465 nm. (b) Fluorescence intensities of TPE-Im ⊂ PH1 (black line), TPE-Im ⊂ PH2 (red line), TPE-Im ⊂ PH3 (blue line) and TPE-Im ⊂ PH4 (orange line) appeared at 465 nm.

In regard to line chart of emission intensities of SAIEE systems in THF regulated by different length of hydrophilic chains as depicted in Fig. S33 and S34, these results showed that SAIEE systems based on PH1, PH2 and PH3 exhibited similar emission intensities, indicating that the molecular weight and/or length of hydrophilic chains hardly affect the optical performance. In particular, the density of macrocycle and number of guest moiety exhibited

relatively large effect on their fluorescence emission intensities, which could be concluded from the abovementioned data.

#### 4. Stimuli-responsive behavior

Due to the reversible assembly endowed by host-guest interactions, supramolecular networks formed by TPE-(Im)<sub>4</sub> ⊂ PH4 in THF solution exhibited stimuli-responsive behavior with addition of competitive agents and temperature variation. Upon addition of competitive agent adiponitrile that exhibited stronger binding affinity towards pillar[5]arene cavities, the supramolecular networks were broken, resulting in the quench of fluorescence (Fig. S35). Furthermore, the emission of supramolecular networks were also quenched by elevated temperature, and the fluorescence could be recovered when cooled down to room temperature for at least 7 cycles which was ascribed to the reversible assembly (Fig. S36 and S37).

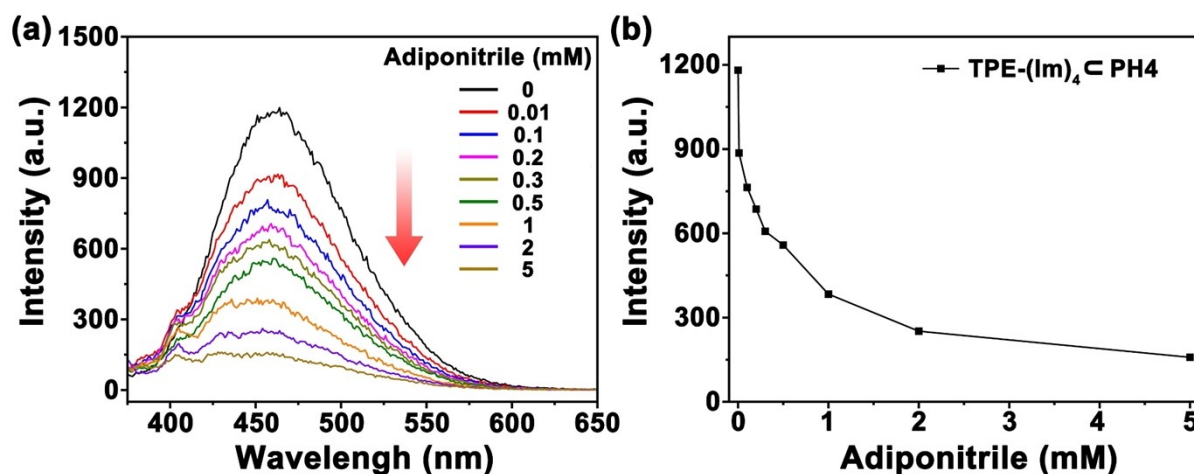

**Fig. S35.** (a) Fluorescence emission spectra of TPE-(Im)<sub>4</sub> ⊂ PH4 in THF solution upon addition of adiponitrile with different concentration ( $\lambda_{\text{ex}} = 330 \text{ nm}$ ;  $25 \text{ }^\circ\text{C}$ ;  $[\text{TPE}-(\text{Im})_4] = 1 \times 10^{-6} \text{ M}$ ,  $[\text{adiponitrile}] = 0, 0.01, 0.1, 0.2, 0.3, 0.5, 1, 2, 5 \times 10^{-3} \text{ M}$ ,  $[\text{pillar}[5]\text{arene unit}] = 1 \times 10^{-5} \text{ M}$ ). (b) Emission intensities of TPE-(Im)<sub>4</sub> ⊂ PH4 appeared at 465 nm with various concentration of adiponitrile.

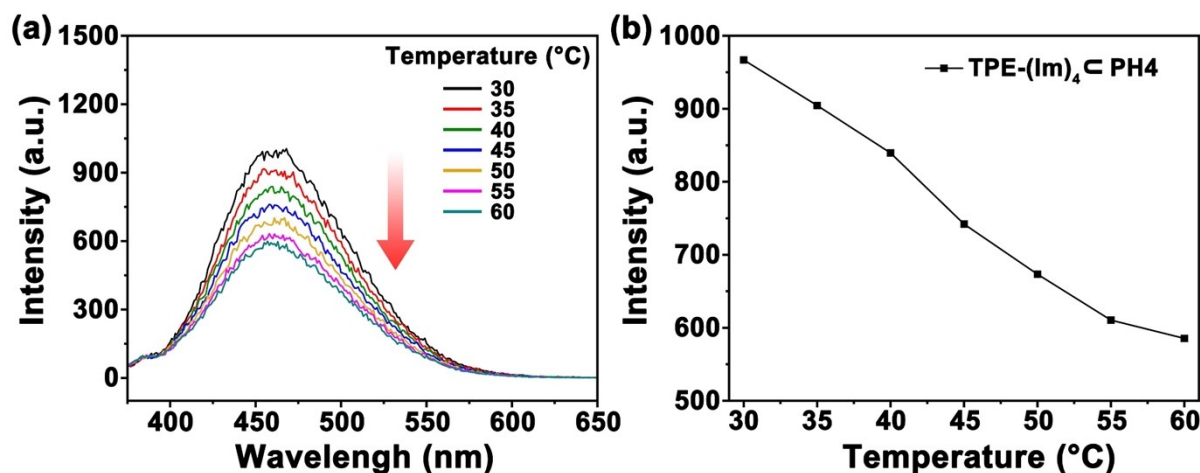

**Fig. S36.** (a) Fluorescence emission spectra of TPE-(Im)<sub>4</sub> c PH4 in THF solution with elevated temperature. (b) Line chart of emission intensities of TPE-(Im)<sub>4</sub> c PH4 appeared at 465 nm with temperature variation. Experimental conditions:  $\lambda_{\text{ex}} = 330 \text{ nm}$ ; [pillar[5]arene unit] = 10  $\mu\text{M}$ ; [TPE-(Im)<sub>4</sub>] = 1  $\mu\text{M}$ .

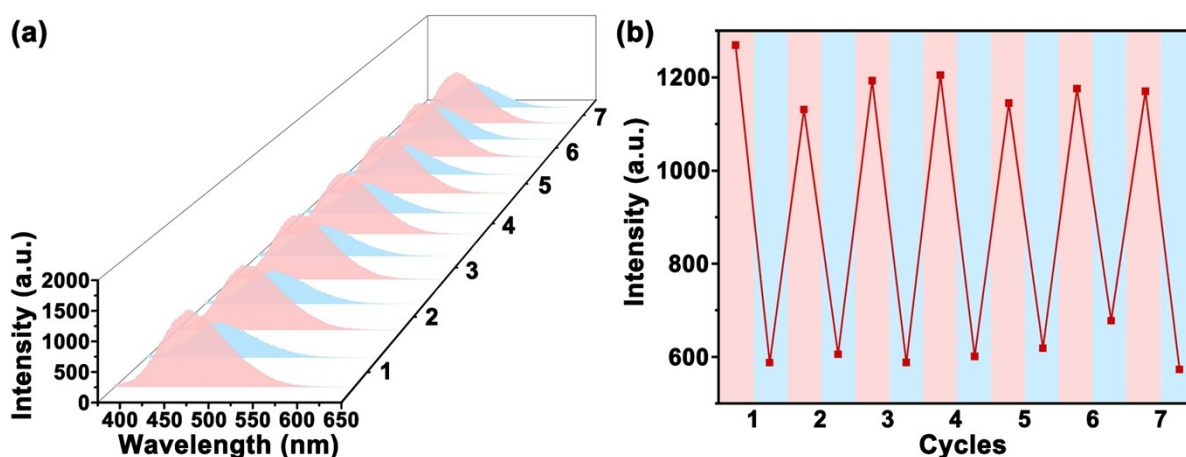

**Fig. S37.** (a) Fluorescence emission spectra of TPE-(Im)<sub>4</sub> c PH4 in seven thermal cycles, 30 °C (red), 60 °C (blue); (b) Line chart of emission intensities of TPE-(Im)<sub>4</sub> c PH4 in seven thermal cycles appeared at 465 nm. Experimental conditions:  $\lambda_{\text{ex}} = 330 \text{ nm}$ ; [pillar[5]arene unit] = 10  $\mu\text{M}$ ; [TPE-(Im)<sub>4</sub>] = 1  $\mu\text{M}$ .

## 5. Fluorescence enhancement of supramolecular assembly

It is well known that the morphology of self-assembly was largely depended on the amphipathy of macromolecules, as a result, we designed three types of block polymer hosts to

discuss the effect of morphology on optical performance. Surprisingly, the emission intensities of TPE-(Im)<sub>4</sub> ⊂ PH1, TPE-(Im)<sub>4</sub> ⊂ PH2 and TPE-(Im)<sub>4</sub> ⊂ PH3 were comparable while all three SAIEE systems exhibited continuously increased emission intensity upon addition of water in mixture solution (Fig. S41-S43). Furthermore, the optical performance of TPE-(Im)<sub>4</sub> ⊂ PH4 with double density of pillar[5]arene unit was almost identical to the abovementioned three polymer hosts (Fig. S44), which was opposite to those in THF solution. From the line chart of TPE-(Im)<sub>4</sub> and TPE-(Im)<sub>4</sub> & P-c in THF/H<sub>2</sub>O mixed solvent with different  $f_w$  (Fig. S47), we could draw a conclusion that the hydrophobic interactions of amphiphilic polymer P-c was beneficial to the emission enhancement of chromophores due to the formation of nanoparticles. Surprisingly, the TPE-(Im)<sub>4</sub> ⊂ PH2 in mixture solution exhibited the maximum emission intensity due to the concurrence of host-guest interactions and hydrophobic assembly of macromolecules.

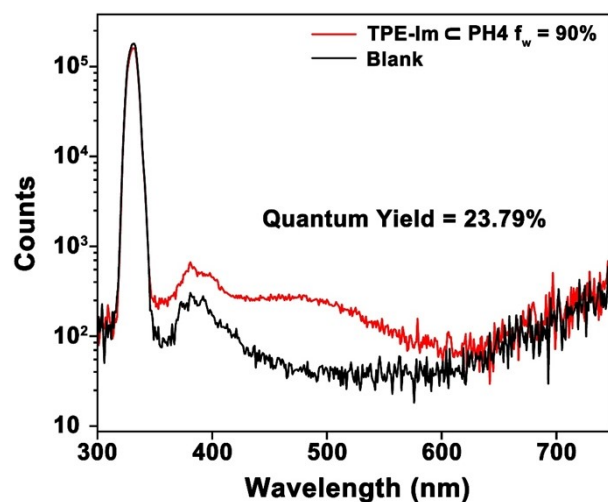

**Fig. S38.** Absolute fluorescence quantum yields of TPE-Im ⊂ PH4 in THF/H<sub>2</sub>O mixed solution. Experimental conditions:  $\lambda_{\text{ex}} = 330 \text{ nm}$ ; [pillar[5]arene unit] = 10  $\mu\text{M}$ ; [TPE-(Im)<sub>4</sub>] = 1  $\mu\text{M}$ ;  $f_w = 90\%$ ; 25 °C.

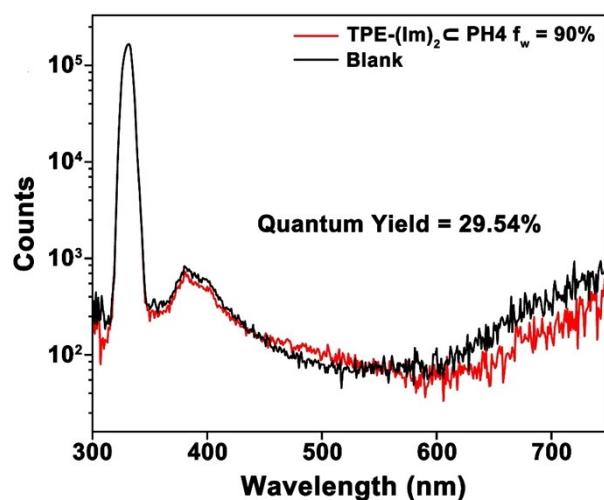

**Fig. S39.** Absolute fluorescence quantum yields of TPE-(Im)<sub>2</sub> c PH4 in THF/H<sub>2</sub>O mixed solution. Experimental conditions:  $\lambda_{\text{ex}} = 330 \text{ nm}$ ; [pillar[5]arene unit] = 10  $\mu\text{M}$ ; [TPE-(Im)<sub>4</sub>] = 1  $\mu\text{M}$ ;  $f_w = 90\%$ ; 25  $^\circ\text{C}$ .

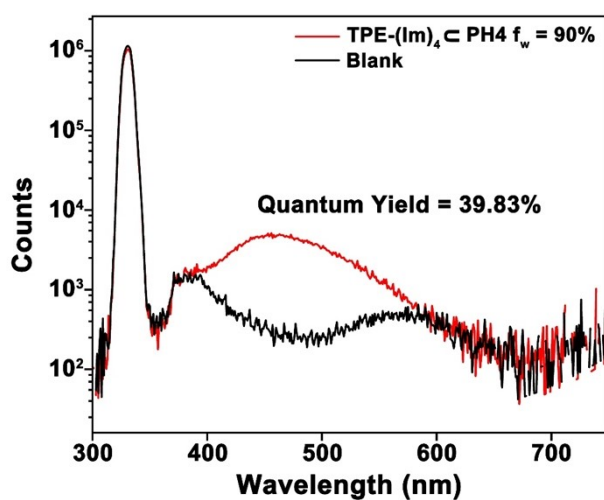

**Fig. S40.** Absolute fluorescence quantum yields of TPE-(Im)<sub>4</sub> c PH4 in THF/H<sub>2</sub>O mixed solution. Experimental conditions:  $\lambda_{\text{ex}} = 330 \text{ nm}$ ; [pillar[5]arene unit] = 10  $\mu\text{M}$ ; [TPE-(Im)<sub>4</sub>] = 1  $\mu\text{M}$ ;  $f_w = 90\%$ ; 25  $^\circ\text{C}$ .



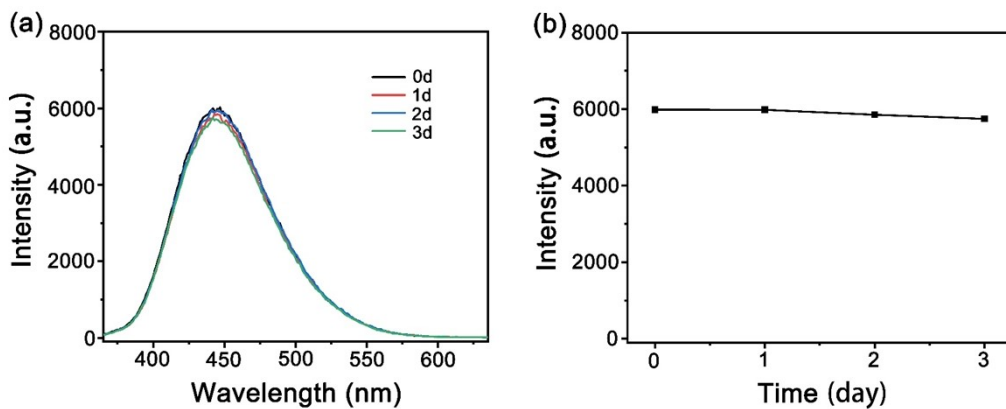

**Fig. S41.** (a) Fluorescence emission spectra and (b) line chart of TPE-(Im)<sub>4</sub> c PH1 in THF/H<sub>2</sub>O mixed solvent with different days.

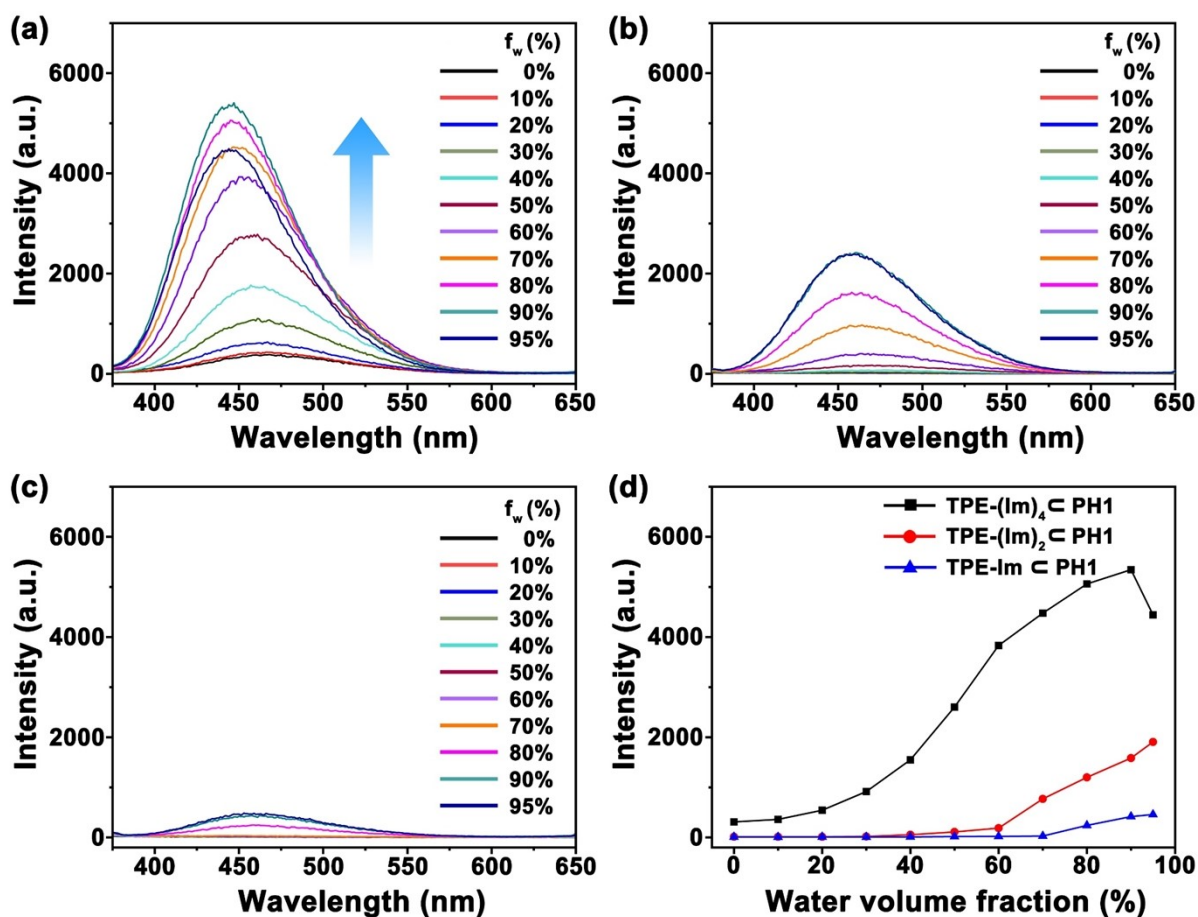

**Fig. S42.** Fluorescence emission spectra of (a) TPE-(Im)<sub>4</sub> c PH1, (b) TPE-(Im)<sub>2</sub> c PH1 and (c) TPE-Im c PH1 in THF/H<sub>2</sub>O mixed solvent with various  $f_w$ . (d) Line chart of TPE-(Im)<sub>4</sub> c PH1 (black line), TPE-(Im)<sub>2</sub> c PH1 (red line) and TPE-Im c PH1 (blue line) in THF/H<sub>2</sub>O mixed solvent with various  $f_w$ . Experimental conditions:  $\lambda_{ex} = 330$  nm; slit widths: ex 5 nm, em 2.5

nm;  $[\text{TPE}-(\text{Im})_4] = 1 \times 10^{-6} \text{ M}$ ,  $[\text{TPE}-(\text{Im})_2] = 1 \times 10^{-6} \text{ M}$ ,  $[\text{TPE-Im}] = 1 \times 10^{-6} \text{ M}$ ,  
 $[\text{pillar}[5]\text{arene unit}] = 1 \times 10^{-5} \text{ M}$ ; 25 °C.

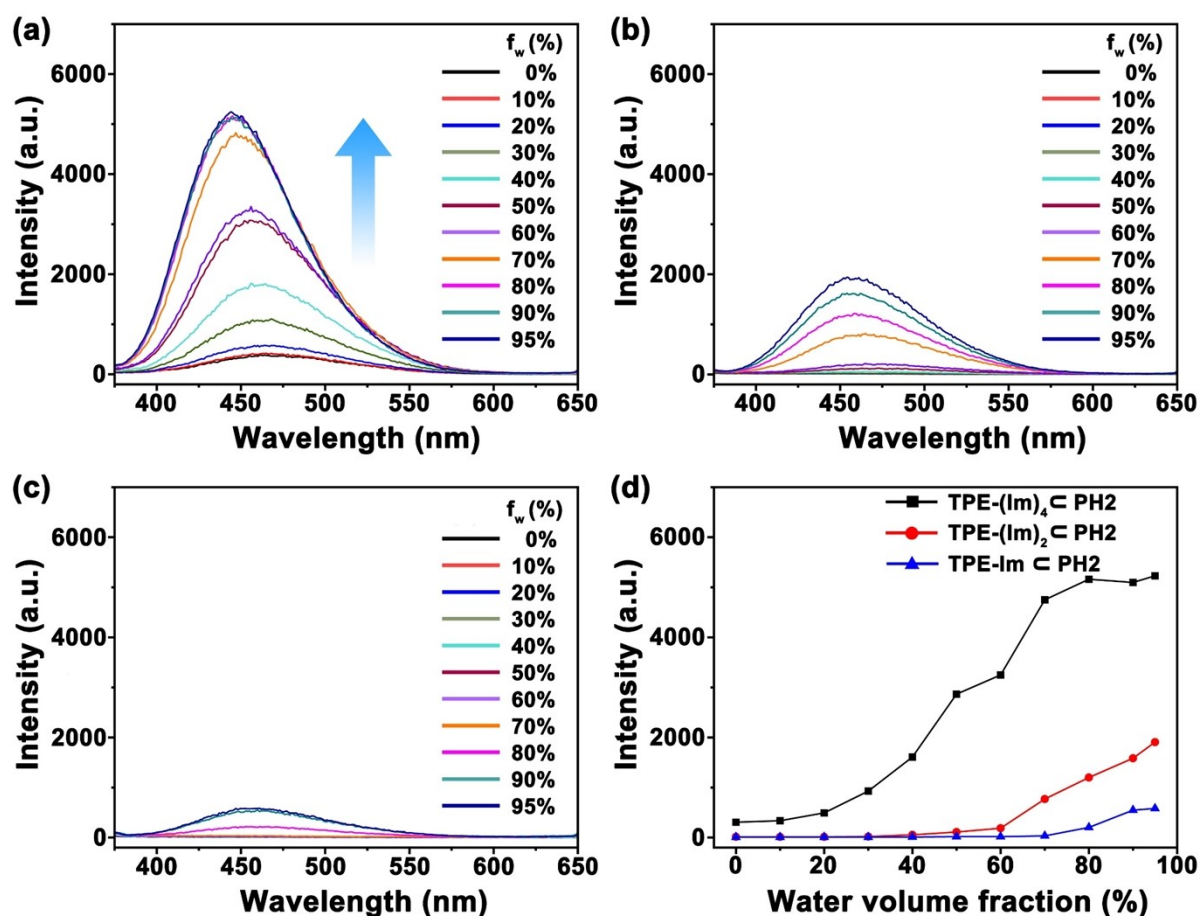

**Fig. S43.** Fluorescence emission spectra of (a) TPE-(Im)<sub>4</sub> c PH<sub>2</sub>, (b) TPE-(Im)<sub>2</sub> c PH<sub>2</sub> and (c) TPE-Im c PH<sub>2</sub> in THF/H<sub>2</sub>O mixed solvent with various  $f_w$ . (d) Line chart of TPE-(Im)<sub>4</sub> c PH<sub>2</sub> (black line), TPE-(Im)<sub>2</sub> c PH<sub>2</sub> (red line) and TPE-Im c PH<sub>2</sub> (blue line) in THF/H<sub>2</sub>O mixed solvent with various  $f_w$ . (Experimental conditions:  $\lambda_{\text{ex}} = 330 \text{ nm}$ ; slit widths: ex 5 nm, em 2.5 nm;  $[\text{TPE}-(\text{Im})_4] = 1 \times 10^{-6} \text{ M}$ ,  $[\text{TPE}-(\text{Im})_2] = 1 \times 10^{-6} \text{ M}$ ,  $[\text{TPE-Im}] = 1 \times 10^{-6} \text{ M}$ ,  $[\text{pillar}[5]\text{arene unit}] = 1 \times 10^{-5} \text{ M}$ ; 25 °C)

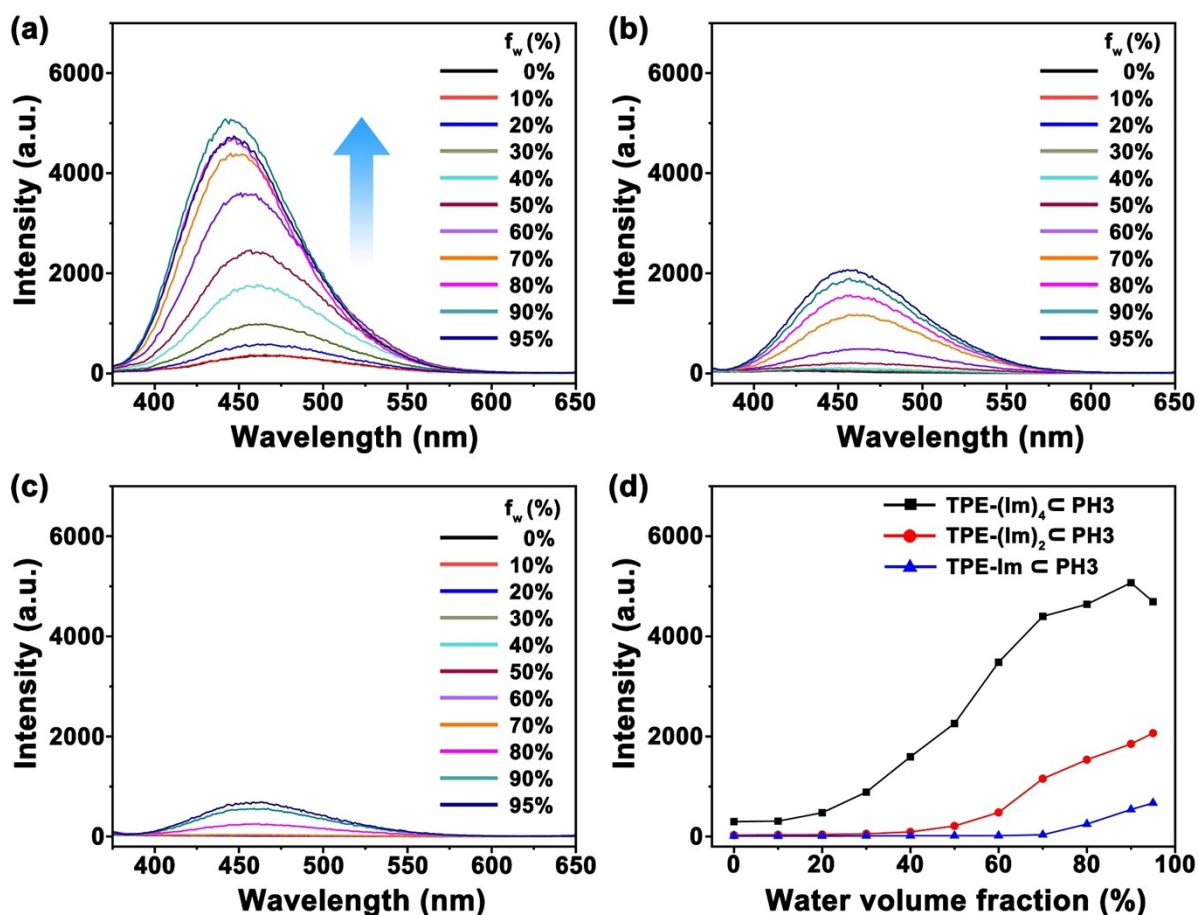

**Fig. S44.** Fluorescence emission spectra of (a) TPE-(Im)<sub>4</sub> ⊂ PH<sub>3</sub>, (b) TPE-(Im)<sub>2</sub> ⊂ PH<sub>3</sub> and (c) TPE-Im ⊂ PH<sub>3</sub> in THF/H<sub>2</sub>O mixed solvent with various  $f_w$ . (d) Line chart of TPE-(Im)<sub>4</sub> ⊂ PH<sub>3</sub> (black line), TPE-(Im)<sub>2</sub> ⊂ PH<sub>3</sub> (red line) and TPE-Im ⊂ PH<sub>3</sub> (blue line) in THF/H<sub>2</sub>O mixed solvent with various  $f_w$ . (Experimental conditions:  $\lambda_{ex}$  = 330 nm; slit widths: ex 5 nm, em 2.5 nm; [TPE-(Im)<sub>4</sub>] =  $1 \times 10^{-6}$  M, [TPE-(Im)<sub>2</sub>] =  $1 \times 10^{-6}$  M, [TPE-Im] =  $1 \times 10^{-6}$  M, [pillar[5]arene unit] =  $1 \times 10^{-5}$  M; 25 °C)

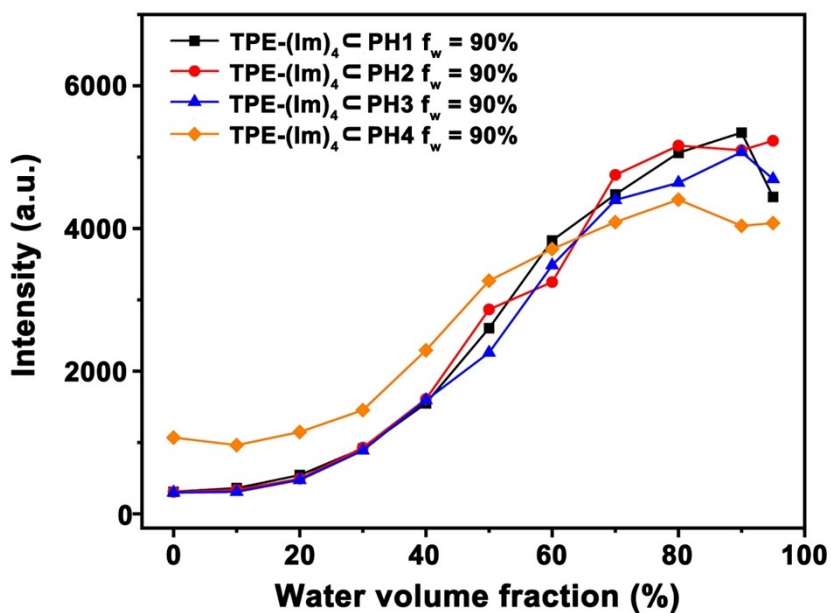

**Fig. S45.** Fluorescence emission intensities of TPE-(Im)<sub>4</sub> ⊂ PH1 (black line), TPE-(Im)<sub>4</sub> ⊂ PH2 (red line), TPE-(Im)<sub>4</sub> ⊂ PH3 (blue line) and TPE-(Im)<sub>4</sub> ⊂ PH4 (orange line) appeared at 445 nm in THF/H<sub>2</sub>O mixed solvent with various  $f_w$ . (Experimental conditions:  $\lambda_{ex}$  = 330 nm; slit widths: ex 5 nm, em 2.5 nm; [TPE-(Im)<sub>4</sub>] =  $1 \times 10^{-6}$  M, [pillar[5]arene unit] =  $1 \times 10^{-5}$  M; 25 °C)

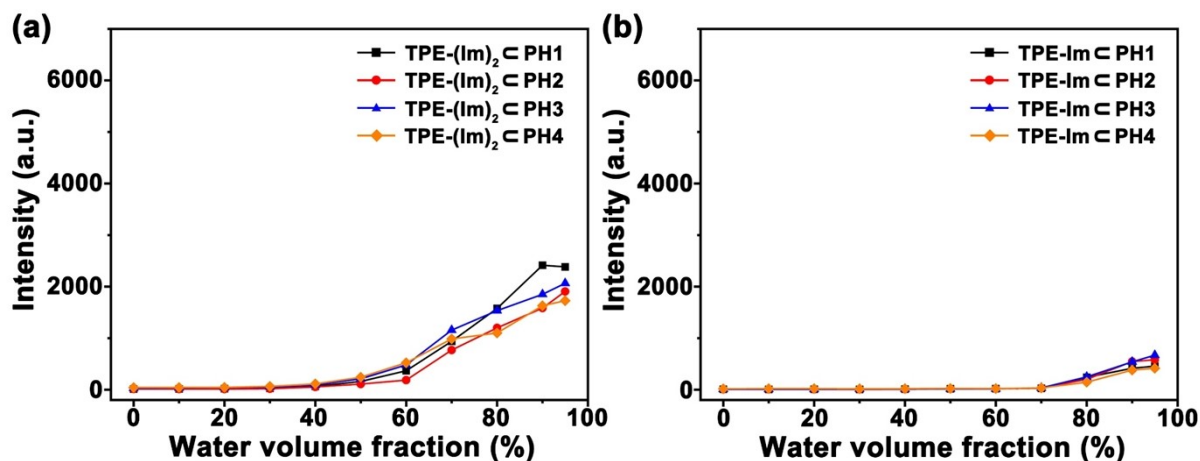

**Fig. S46.** (a) Fluorescence emission intensities of TPE-(Im)<sub>2</sub> ⊂ PH1 (black line), TPE-(Im)<sub>2</sub> ⊂ PH2 (red line), TPE-(Im)<sub>2</sub> ⊂ PH3 (blue line) and TPE-(Im)<sub>2</sub> ⊂ PH4 (orange line) appeared at 445 nm in THF/H<sub>2</sub>O mixed solvent with various  $f_w$ . (b) Fluorescence intensities of TPE-Im ⊂ PH1 (black line), TPE-Im ⊂ PH2 (red line), TPE-Im ⊂ PH3 (blue line) and TPE-Im ⊂ PH4 (orange line) at 445 nm in THF/H<sub>2</sub>O mixed solvent with various  $f_w$ . (Experimental conditions:

$\lambda_{\text{ex}} = 330 \text{ nm}$ ; slit widths: ex 5 nm, em 2.5 nm;  $[\text{TPE}-(\text{Im})_2] = 1 \times 10^{-6} \text{ M}$ ,  $[\text{TPE}-(\text{Im})_4] = 1 \times 10^{-6} \text{ M}$ ,  $[\text{pillar}[5]\text{arene unit}] = 1 \times 10^{-5} \text{ M}$ ;  $25 \text{ }^\circ\text{C}$ )

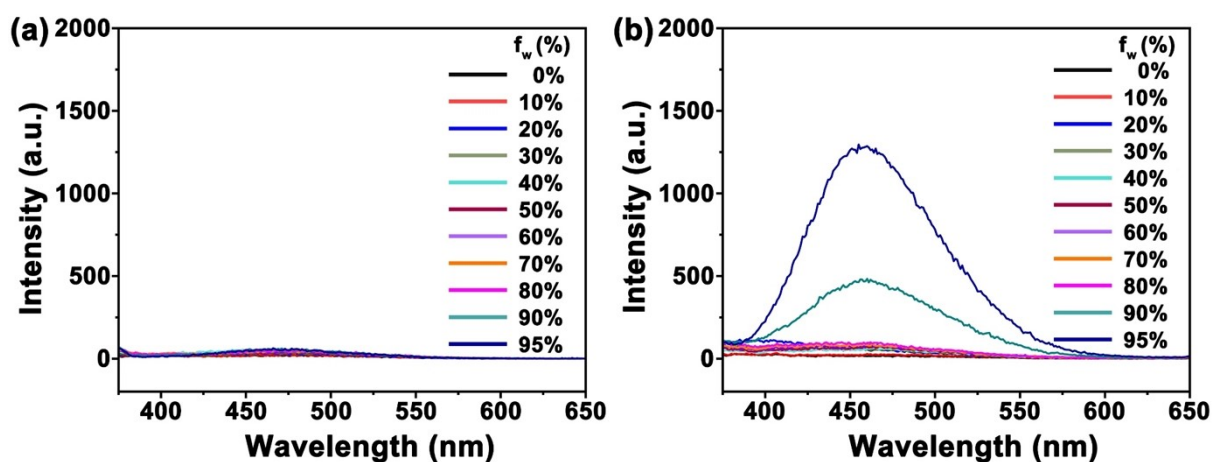

**Fig. S47.** Fluorescence emission intensities of (a)  $\text{TPE}-(\text{Im})_4$  and (b)  $\text{TPE}-(\text{Im})_4$  & P-c in THF/ $\text{H}_2\text{O}$  mixed solvent with various  $f_w$ . (Experimental conditions:  $\lambda_{\text{ex}} = 330 \text{ nm}$ ; slit widths: ex 5 nm, em 2.5 nm;  $[\text{TPE}-(\text{Im})_4] = 1 \times 10^{-6} \text{ M}$ ,  $C_{(\text{P-c})} = 0.03 \text{ mg/mL}$ ;  $25 \text{ }^\circ\text{C}$ )

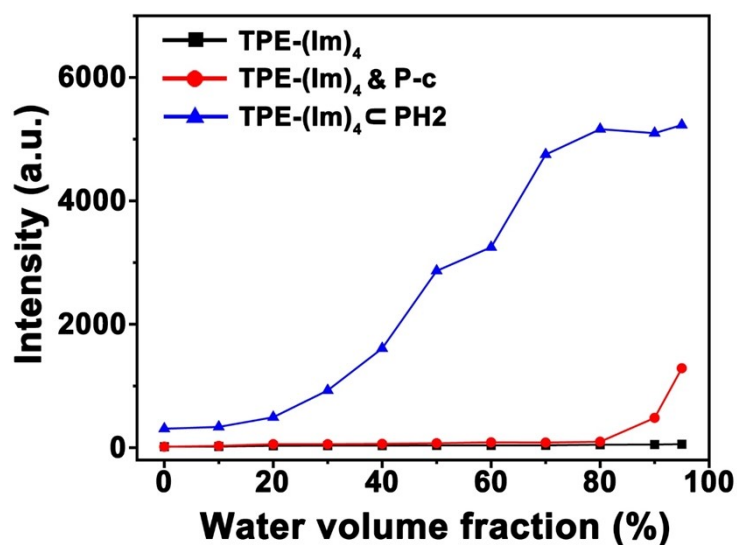

**Fig. S48.** Comparison of emission intensities appeared at 445 nm of  $\text{TPE}-(\text{Im})_4$  (black line),  $\text{TPE}-(\text{Im})_4 \subset \text{PH2}$  (blue line) and  $\text{TPE}-(\text{Im})_4$  & P-c (red line) in THF/ $\text{H}_2\text{O}$  mixed solvent with various  $f_w$ . As shown in Fig. S47, although the emission intensity of  $\text{TPE}-(\text{Im})_4$  & P-c was intensified upon addition of P-c, the emission intensity of  $\text{TPE}-(\text{Im})_4 \subset \text{PH2}$  was much higher than those of  $\text{TPE}-(\text{Im})_4$  & P-c, suggesting the crucial function of molecular recognition.

## 6. Characterization of morphology

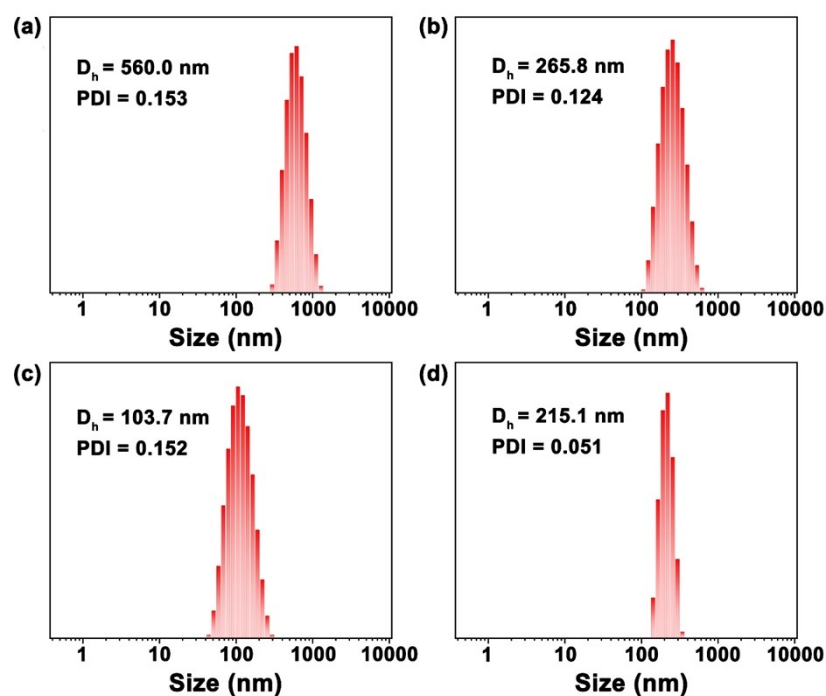

**Fig. S49.** Hydrodynamic sizes of (a) TPE-(Im)<sub>4</sub> ⊂ PH1; (b) TPE-(Im)<sub>4</sub> ⊂ PH2; (c) TPE-(Im)<sub>4</sub> ⊂ PH3 and (d) TPE-(Im)<sub>4</sub> ⊂ PH4 in THF/H<sub>2</sub>O mixed solvent with  $f_w$  of 90%. (Experimental conditions: [TPE-(Im)<sub>4</sub>] =  $1 \times 10^{-6}$  M, [pillar[5]arene unit] =  $1 \times 10^{-5}$  M)

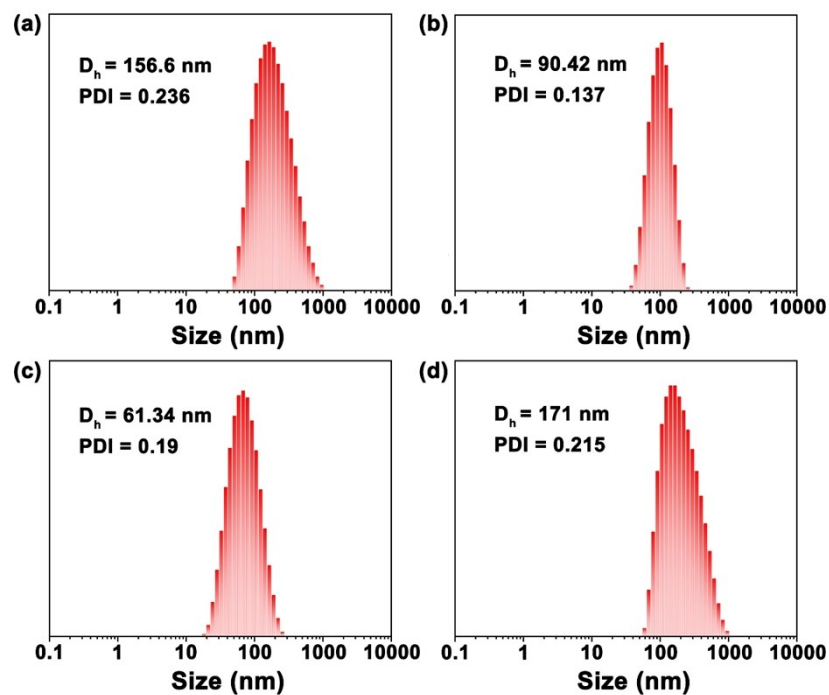

**Fig. S50.** Hydrodynamic sizes of (a) TPE-(Im)<sub>4</sub> ⊂ PH1; (b) TPE-(Im)<sub>4</sub> ⊂ PH2; (c) TPE-(Im)<sub>4</sub> ⊂ PH3 and (d) TPE-(Im)<sub>4</sub> ⊂ PH4 in aqueous solution. (Experimental conditions: [TPE-(Im)<sub>4</sub>] = 1 × 10<sup>-6</sup> M, [pillar[5]arene unit] = 1 × 10<sup>-5</sup> M)

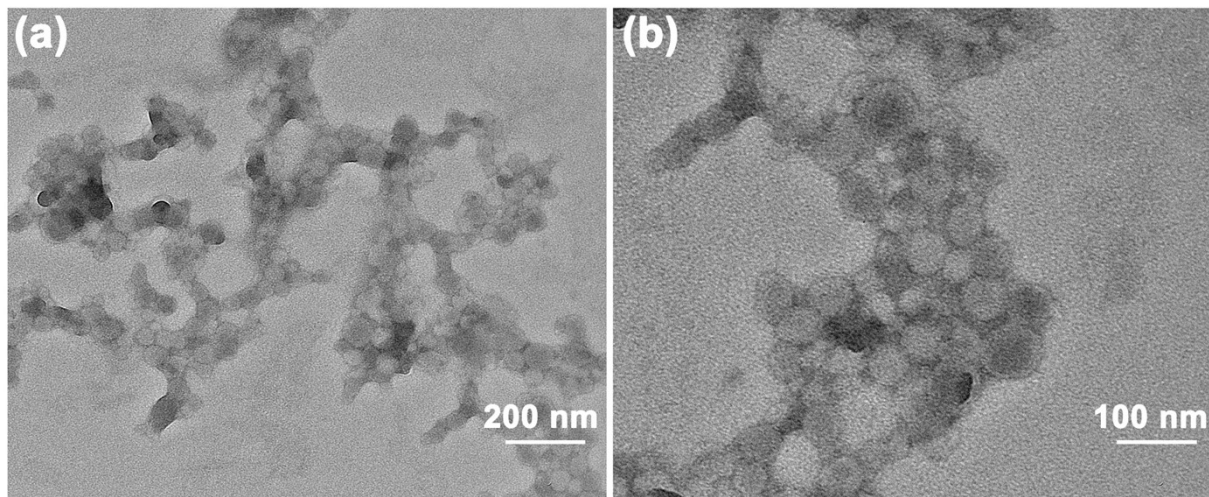

**Fig. S51.** TEM images of TPE-(Im)<sub>4</sub> ⊂ PH4 supramolecular vesicles after dialysis against water for 24 h. (Experimental conditions: [TPE-(Im)<sub>4</sub>] = 1 × 10<sup>-6</sup> M, [pillar[5]arene unit] = 1 × 10<sup>-5</sup> M). The distinct boundary of supramolecular assembly suggested the vesicle structures of TPE-(Im)<sub>4</sub> ⊂ PH4 in aqueous solution, and their thickness were measured to be ca. 8 nm.

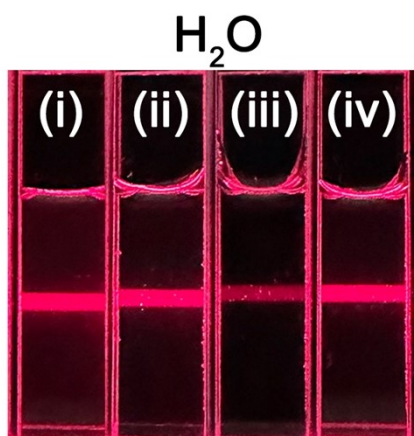

**Fig. S52.** Tyndell effect of (i) TPE-(Im)<sub>4</sub> ⊂ PH1, (ii) TPE-(Im)<sub>4</sub> ⊂ PH2, (iii) TPE-(Im)<sub>4</sub> ⊂ PH3 and (iv) TPE-(Im)<sub>4</sub> ⊂ PH4 in aqueous solution. (Experimental conditions: [TPE-(Im)<sub>4</sub>] = 1 × 10<sup>-6</sup> M, [pillar[5]arene unit] = 1 × 10<sup>-5</sup> M). The observed tyndell effect suggested the formation of supramolecular assembly in aqueous solution.

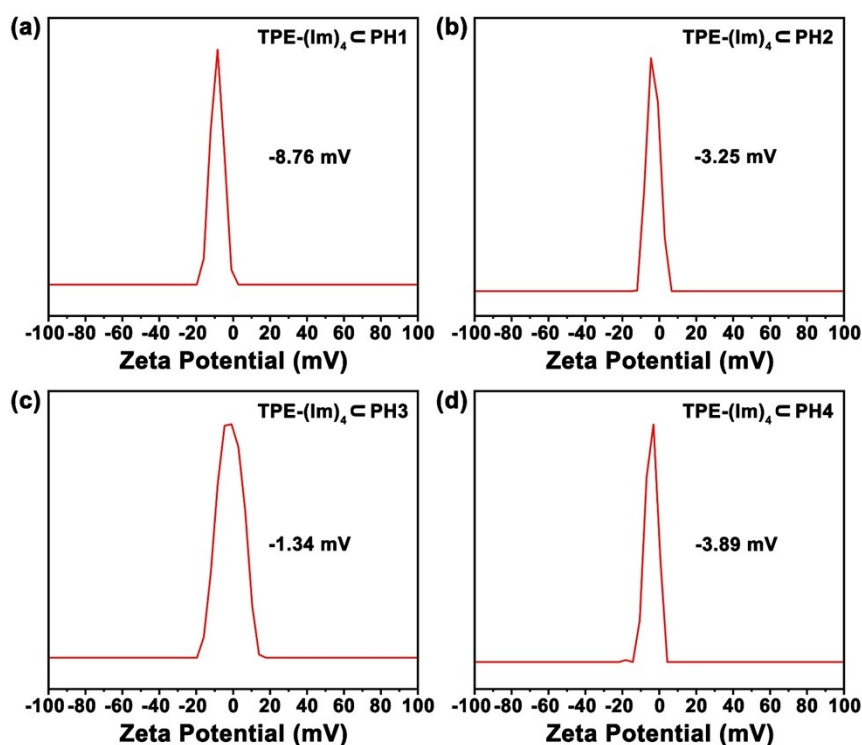

**Fig. S53.** Zeta potential of (a) TPE-(Im)<sub>4</sub> ⊂ PH1; (b) TPE-(Im)<sub>4</sub> ⊂ PH2; (c) TPE-(Im)<sub>4</sub> ⊂ PH3 and (d) TPE-(Im)<sub>4</sub> ⊂ PH4 in aqueous solution. (Experimental conditions: [TPE-(Im)<sub>4</sub>] = 1 × 10<sup>-6</sup> M, [pillar[5]arene unit] = 1 × 10<sup>-5</sup> M)

The zeta potential of polymeric vesicles became electroneutrality upon lengthen the hydrophilic segments due to the supramolecular assembly was embedded by more PEGMA<sub>300</sub>.

## 7. Fabrication of artificial light-harvesting systems

Calculation of energy transfer efficiency ( $\Phi_{ET}$ ):

Energy transfer efficiency was calculated by the following equation:

$$\Phi_{ET} = 1 - (I_{DA, 330} / I_{D, 330})$$

$I_{DA, 330}$  represent the emission intensity of TPE-(Im)<sub>4</sub> & DBT ⊂ PH4 appeared at 445 nm with different concentration of DBT under excitation at 330 nm;  $I_{D, 330}$  represent the emission intensity of TPE-(Im)<sub>4</sub> ⊂ PH4 appeared at 445 nm without DBT under excitation at 330 nm. The  $\Phi_{ET}$  was depicted in Tables S1-S4 with different concentration of DBT in artificial light-harvesting systems.



Calculation of antenna effect (AE):

The antenna effect was calculated according to the following equation:

$$AE = (I_{DA, 330} - I_{D, 330}) / I_{DA, 445}$$

$I_{DA, 330}$  represent the the fluorescence emission intensity at 545 nm of TPE-(Im)<sub>4</sub> & DBT  $\subset$  PH4 under excitation at 330 nm;  $I_{D, 330}$  represent the fluorescence emission intensity at 545 nm of TPE-(Im)<sub>4</sub>  $\subset$  PH4 under excitation at 330 nm;  $I_{DA, 445}$  represent the the fluorescence emission intensity at 545 nm of TPE-(Im)<sub>4</sub> & DBT  $\subset$  PH4 under excitation at 445 nm. The AE value was depicted in Tables S1-S4 with different concentration of DBT in artificial light-harvesting systems.

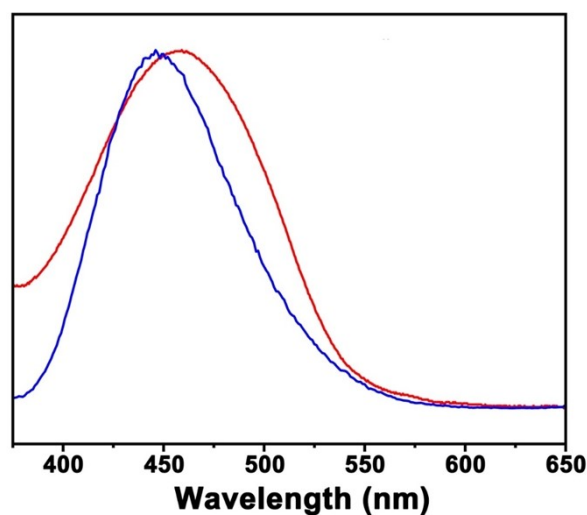

**Fig. S54.** The overlapped of normalized fluorescence emission spectrum of TPE-(Im)<sub>4</sub>  $\subset$  PH4 (blue line) and ultraviolet-visible spectrum of DBT (red line). Experimental conditions:  $\lambda_{ex}$  = 330 nm,  $f_w$  = 90%, [TPE-(Im)<sub>4</sub>] =  $1 \times 10^{-6}$  M, [DBT] =  $3 \times 10^{-5}$  M, [pillar[5]arene unit] =  $1 \times 10^{-5}$  M.

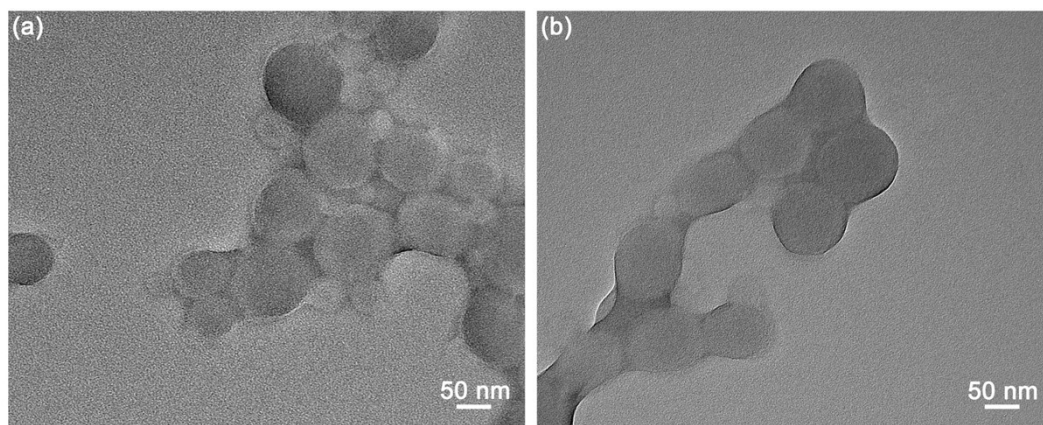

**Fig. S55.** TEM images of TPE-(Im)<sub>4</sub> & DBT c PH4 supramolecular polymer vesicles after dialysis against water for 24 h, [TPE-(Im)<sub>4</sub>] = 1 × 10<sup>-6</sup> M, [DBT] = 5 × 10<sup>-7</sup> M, [pillar[5]arene unit] = 1 × 10<sup>-5</sup> M.

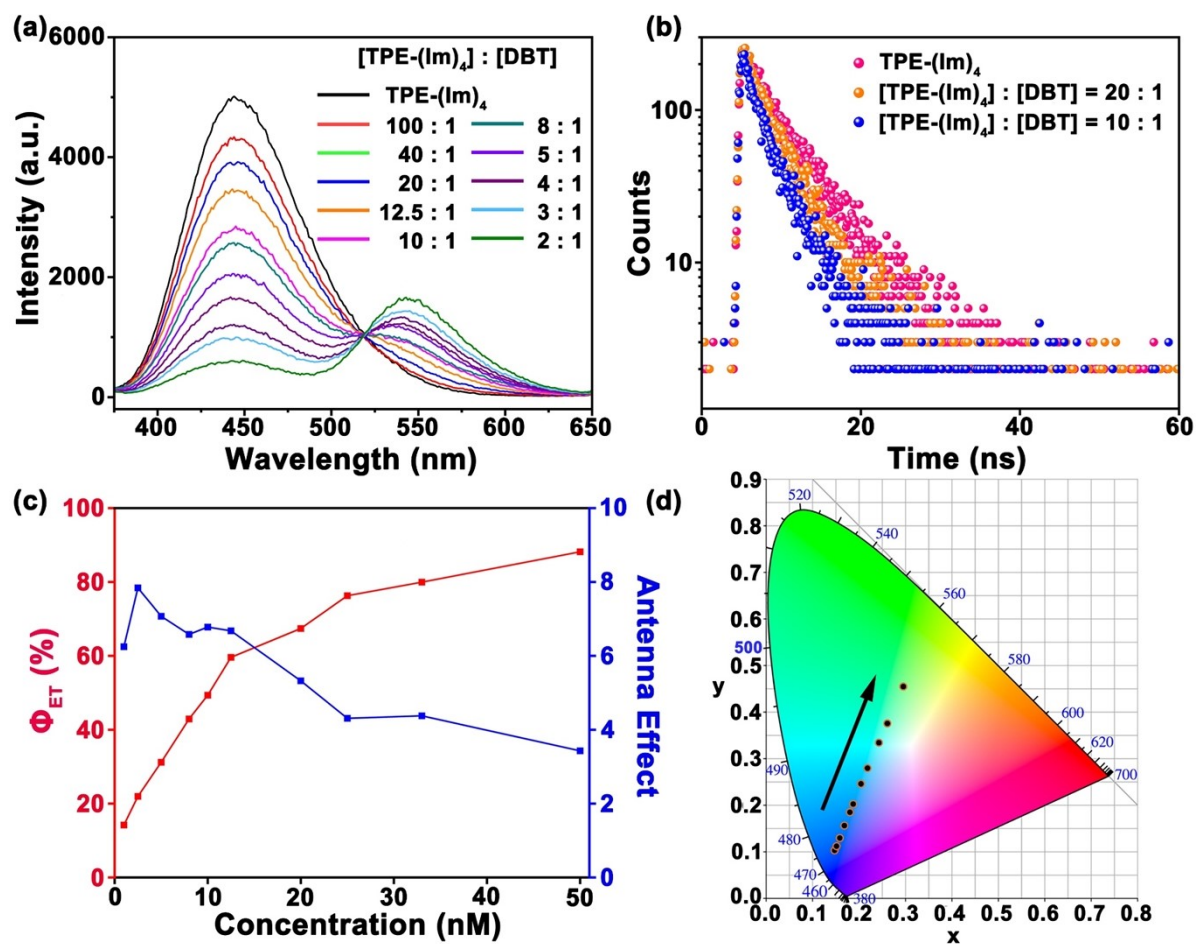

**Fig. S56.** (a) Fluorescence emission spectra of TPE-(Im)<sub>4</sub> & DBT c PH1 in THF/H<sub>2</sub>O mixed solvent. (Experimental conditions:  $\lambda_{\text{ex}} = 330$  nm; slit widths: ex 5 nm, em 2.5 nm; [pillar[5]arene unit] = 10  $\mu\text{M}$ ; [TPE-(Im)<sub>4</sub>] = 1  $\mu\text{M}$ ; [DBT] = 0, 10, 25, 50, 80, 100, 125, 200, 250, 333, 500

nM; 25 °C;  $f_w = 90\%$ ). (b) Fluorescence decay profiles of and TPE-(Im)<sub>4</sub> ⊂ PH1 (pink dot) and TPE-(Im)<sub>4</sub> & DBT ⊂ PH1 amphiphilic polymer carrier with D/A ratio of 20 (orange dot) and 10 (blue dot) monitored at 445 nm. (c)  $\Phi_{ET}$  and AE of TPE-(Im)<sub>4</sub> & DBT ⊂ PH1 with different DBT concentrations. (d) Fluorescence emission spectra of TPE-(Im)<sub>4</sub> & DBT ⊂ PH1 supramolecular micelles with different D/A ratios depicted in CIE coordinates.

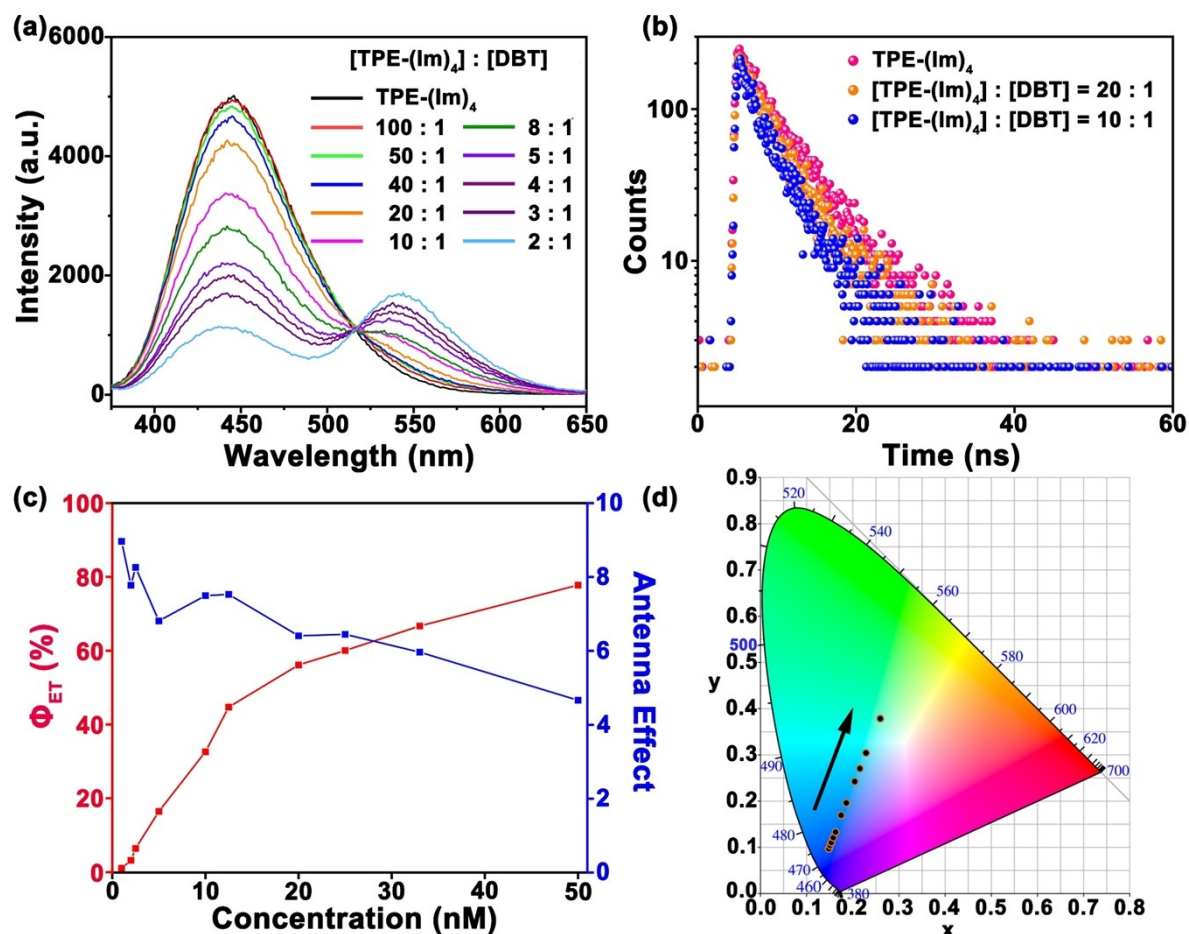

**Fig. S57.** (a) Fluorescence emission spectra of TPE-(Im)<sub>4</sub> & DBT ⊂ PH3 in THF/H<sub>2</sub>O mixed solvent. (Experimental conditions:  $\lambda_{ex} = 330$  nm; slit widths: ex 5 nm, em 2.5 nm; [pillar[5]arene unit] = 10  $\mu$ M; [TPE-(Im)<sub>4</sub>] = 1  $\mu$ M; [DBT] = 0, 10, 20, 25, 50, 100, 125, 200, 250, 333, 500 nM; 25 °C;  $f_w = 90\%$ ). (b) Fluorescence decay profiles of and TPE-(Im)<sub>4</sub> (pink dot) and TPE-(Im)<sub>4</sub> & DBT ⊂ PH1 amphiphilic polymer carrier with D/A ratio of 20 (orange dot) and 10 (blue dot) monitored at 445 nm. (c)  $\Phi_{ET}$  and AE of TPE-(Im)<sub>4</sub> & DBT ⊂ PH3 with different DBT

concentrations. (d) Fluorescence emission spectra of TPE-(Im)<sub>4</sub> & DBT ⊂ PH3 supramolecular vesicles with different D/A ratios depicted in CIE coordinates.

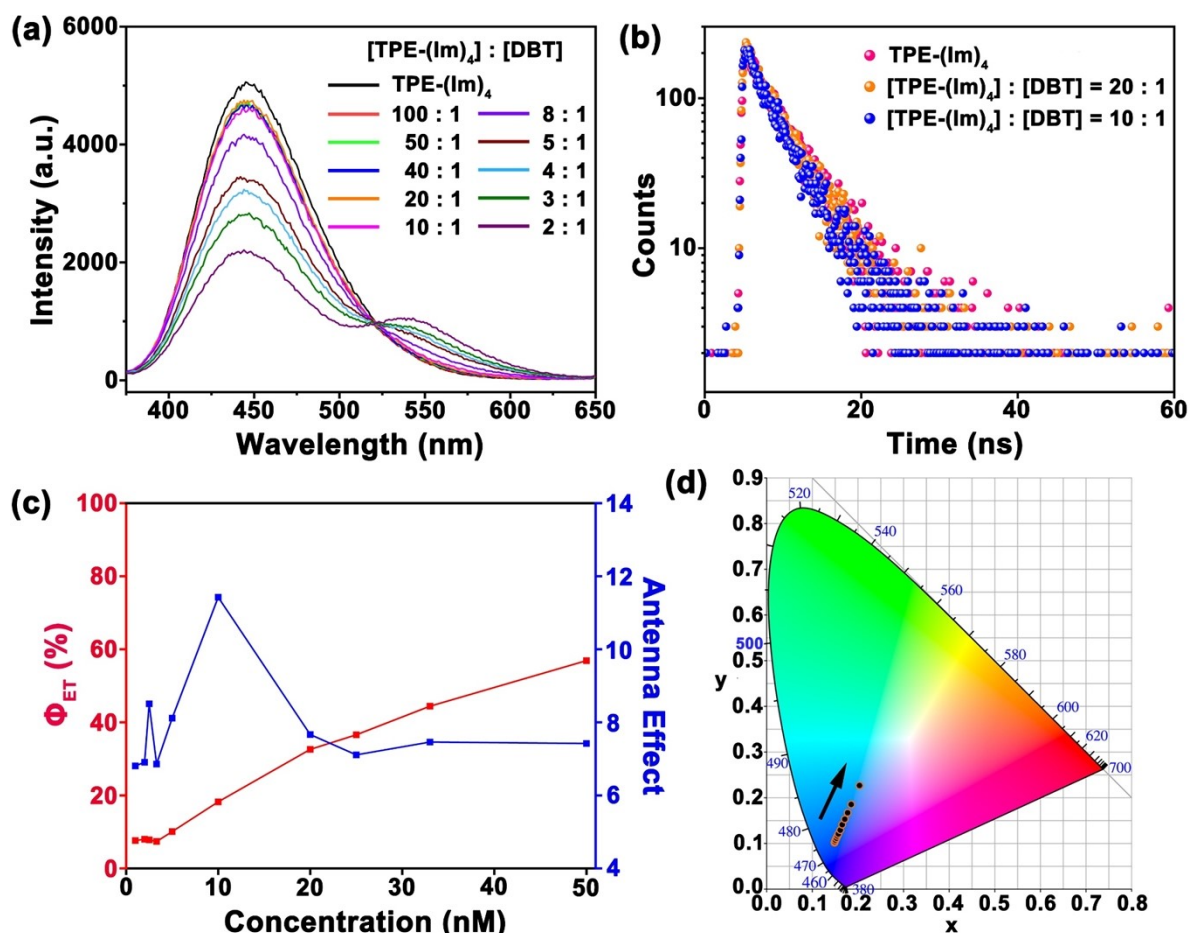

**Fig. S58.** (a) Fluorescence emission spectra of TPE-(Im)<sub>4</sub> & DBT ⊂ PH1 in THF/H<sub>2</sub>O mixed solvent. (Experimental conditions:  $\lambda_{\text{ex}} = 330$  nm; slit widths: ex 5 nm, em 2.5 nm; [pillar[5]arene unit] = 10  $\mu\text{M}$ ; [TPE-(Im)<sub>4</sub>] = 1  $\mu\text{M}$ ; [DBT] = 0, 10, 20, 25, 50, 100, 125, 200, 250, 333, 500 nM; 25 °C;  $f_w = 80\%$ ). (b) Fluorescence decay profiles of and TPE-(Im)<sub>4</sub> ⊂ PH1 (pink dots) and TPE-(Im)<sub>4</sub> & DBT ⊂ PH1 amphiphilic polymer carrier with D/A ratio of 20 (orange dots) and 10 (blue dots) monitored at 445 nm. (c)  $\Phi_{\text{ET}}$  and AE of TPE-(Im)<sub>4</sub> & DBT ⊂ PH1 with different DBT concentrations. (d) Fluorescence emission spectra of TPE-(Im)<sub>4</sub> & DBT ⊂ PH1 supramolecular assembly with different D/A ratios depicted in CIE coordinates.

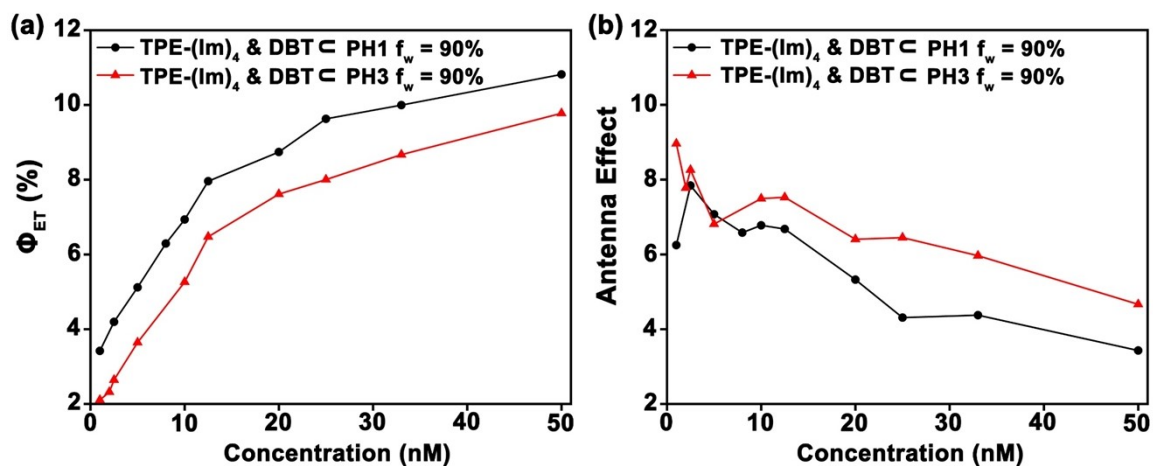

**Fig. S59.** (a)  $\Phi_{ET}$  of TPE-(Im)<sub>4</sub> & DBT c PH1 (black line) and TPE-(Im)<sub>4</sub> & DBT c PH3 (red line) in THF/H<sub>2</sub>O mixed solvent with  $f_w$  of 90%. (b) AE values of TPE-(Im)<sub>4</sub> & DBT c PH1 (black line) and TPE-(Im)<sub>4</sub> & DBT c PH3 (red line) in THF/H<sub>2</sub>O mixed solvent with  $f_w$  of 90%.

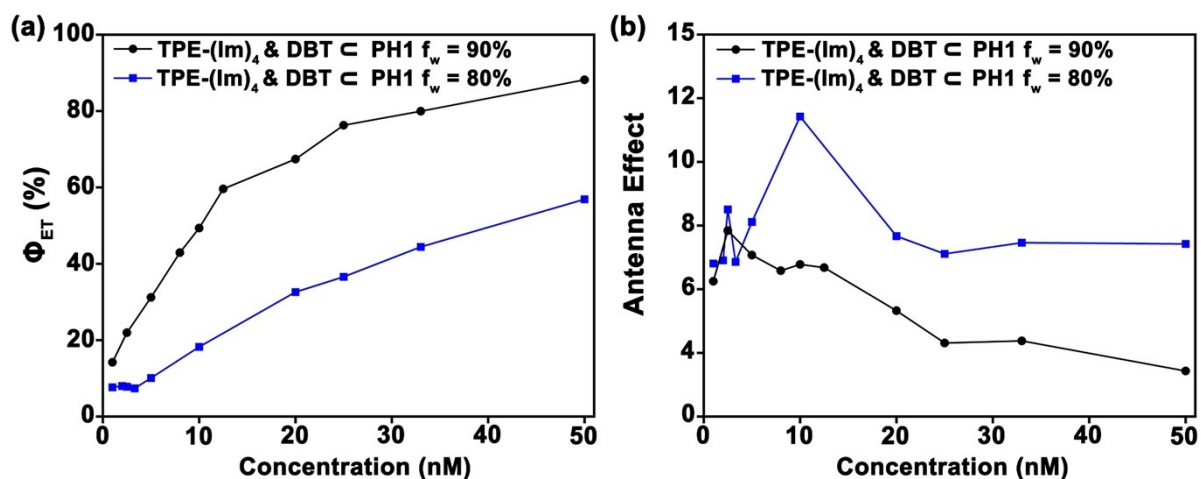

**Fig. S60.** (a)  $\Phi_{ET}$  of TPE-(Im)<sub>4</sub> & DBT c PH1 in THF/H<sub>2</sub>O mixed solvent with  $f_w$  of 90% (black line) and 80 % (blue line). (b) AE values of TPE-(Im)<sub>4</sub> & DBT c PH1 in THF/H<sub>2</sub>O mixed solvent with  $f_w$  of 90% (black line) and 80 % (blue line).

**Table S1.**  $\Phi_{\text{ET}}$  and AE values of TPE-(Im)<sub>4</sub> & DBT c PH4 with  $f_w$  of 90%

| [pillar[5]arene unit] | [TPE-(Im) <sub>4</sub> ] | [DBT]  | $\Phi_{\text{ET}}$ | AE  |
|-----------------------|--------------------------|--------|--------------------|-----|
| 10 $\mu\text{M}$      | 1 $\mu\text{M}$          | 0      | —                  | —   |
| 10 $\mu\text{M}$      | 1 $\mu\text{M}$          | 5 nM   | 4.5                | 2.3 |
| 10 $\mu\text{M}$      | 1 $\mu\text{M}$          | 10 nM  | 13.5               | 4.4 |
| 10 $\mu\text{M}$      | 1 $\mu\text{M}$          | 20 nM  | 20.5               | 6.7 |
| 10 $\mu\text{M}$      | 1 $\mu\text{M}$          | 25 nM  | 24.3               | 7.5 |
| 10 $\mu\text{M}$      | 1 $\mu\text{M}$          | 50 nM  | 38.7               | 6.9 |
| 10 $\mu\text{M}$      | 1 $\mu\text{M}$          | 80 nM  | 43.9               | 6.4 |
| 10 $\mu\text{M}$      | 1 $\mu\text{M}$          | 100 nM | 51.7               | 5.6 |
| 10 $\mu\text{M}$      | 1 $\mu\text{M}$          | 125 nM | 59.9               | 5.7 |
| 10 $\mu\text{M}$      | 1 $\mu\text{M}$          | 200 nM | 71.6               | 5.5 |
| 10 $\mu\text{M}$      | 1 $\mu\text{M}$          | 250 nM | 76.1               | 4.3 |
| 10 $\mu\text{M}$      | 1 $\mu\text{M}$          | 333 nM | 81.3               | 3.8 |
| 10 $\mu\text{M}$      | 1 $\mu\text{M}$          | 500 nM | 89                 | 3.1 |

**Table S2.**  $\Phi_{\text{ET}}$  and AE values of TPE-(Im)<sub>4</sub> & DBT c PH1 with  $f_w$  of 90%

| [pillar[5]arene unit] | [TPE-(Im) <sub>4</sub> ] | [DBT]  | $\Phi_{\text{ET}}$ | AE  |
|-----------------------|--------------------------|--------|--------------------|-----|
| 10 $\mu\text{M}$      | 1 $\mu\text{M}$          | 0      | —                  | —   |
| 10 $\mu\text{M}$      | 1 $\mu\text{M}$          | 10 nM  | 14.2               | 6.3 |
| 10 $\mu\text{M}$      | 1 $\mu\text{M}$          | 25 nM  | 22.0               | 7.8 |
| 10 $\mu\text{M}$      | 1 $\mu\text{M}$          | 50 nM  | 31.2               | 7.1 |
| 10 $\mu\text{M}$      | 1 $\mu\text{M}$          | 80 nM  | 42.9               | 6.6 |
| 10 $\mu\text{M}$      | 1 $\mu\text{M}$          | 100 nM | 49.3               | 6.8 |
| 10 $\mu\text{M}$      | 1 $\mu\text{M}$          | 125 nM | 59.6               | 6.7 |
| 10 $\mu\text{M}$      | 1 $\mu\text{M}$          | 200 nM | 67.4               | 5.3 |
| 10 $\mu\text{M}$      | 1 $\mu\text{M}$          | 250 nM | 76.3               | 4.3 |
| 10 $\mu\text{M}$      | 1 $\mu\text{M}$          | 333 nM | 80.0               | 4.4 |
| 10 $\mu\text{M}$      | 1 $\mu\text{M}$          | 500 nM | 88.2               | 3.4 |

**Table S3.**  $\Phi_{\text{ET}}$  and AE values of TPE-(Im)<sub>4</sub> & DBT  $\subset$  PH3 with  $f_w$  of 90%

| [pillar[5]arene unit] | [TPE-(Im) <sub>4</sub> ] | [DBT]  | $\Phi_{\text{ET}}$ | AE  |
|-----------------------|--------------------------|--------|--------------------|-----|
| 10 $\mu\text{M}$      | 1 $\mu\text{M}$          | 0      | —                  | —   |
| 10 $\mu\text{M}$      | 1 $\mu\text{M}$          | 10 nM  | 1.1                | 9.0 |
| 10 $\mu\text{M}$      | 1 $\mu\text{M}$          | 20 nM  | 3.2                | 7.8 |
| 10 $\mu\text{M}$      | 1 $\mu\text{M}$          | 25 nM  | 6.4                | 8.3 |
| 10 $\mu\text{M}$      | 1 $\mu\text{M}$          | 50 nM  | 16.4               | 6.8 |
| 10 $\mu\text{M}$      | 1 $\mu\text{M}$          | 100 nM | 32.6               | 7.5 |
| 10 $\mu\text{M}$      | 1 $\mu\text{M}$          | 125 nM | 44.7               | 7.5 |
| 10 $\mu\text{M}$      | 1 $\mu\text{M}$          | 200 nM | 56.1               | 6.4 |
| 10 $\mu\text{M}$      | 1 $\mu\text{M}$          | 250 nM | 60.0               | 6.4 |
| 10 $\mu\text{M}$      | 1 $\mu\text{M}$          | 333 nM | 66.7               | 6.0 |
| 10 $\mu\text{M}$      | 1 $\mu\text{M}$          | 500 nM | 77.8               | 4.7 |

**Table S4.**  $\Phi_{\text{ET}}$  and AE values of TPE-(Im)<sub>4</sub> & DBT  $\subset$  PH1 with  $f_w$  of 80%

| [pillar[5]arene unit] | [TPE-(Im) <sub>4</sub> ] | [DBT]  | $\Phi_{\text{ET}}$ | AE   |
|-----------------------|--------------------------|--------|--------------------|------|
| 10 $\mu\text{M}$      | 1 $\mu\text{M}$          | 0      | —                  | —    |
| 10 $\mu\text{M}$      | 1 $\mu\text{M}$          | 10 nM  | 7.6                | 6.8  |
| 10 $\mu\text{M}$      | 1 $\mu\text{M}$          | 20 nM  | 8.0                | 6.9  |
| 10 $\mu\text{M}$      | 1 $\mu\text{M}$          | 25 nM  | 7.8                | 8.5  |
| 10 $\mu\text{M}$      | 1 $\mu\text{M}$          | 33 nM  | 7.4                | 6.9  |
| 10 $\mu\text{M}$      | 1 $\mu\text{M}$          | 50 nM  | 10.1               | 8.1  |
| 10 $\mu\text{M}$      | 1 $\mu\text{M}$          | 100 nM | 18.2               | 11.4 |
| 10 $\mu\text{M}$      | 1 $\mu\text{M}$          | 200 nM | 32.6               | 7.7  |
| 10 $\mu\text{M}$      | 1 $\mu\text{M}$          | 250 nM | 36.6               | 7.1  |
| 10 $\mu\text{M}$      | 1 $\mu\text{M}$          | 333 nM | 44.4               | 7.5  |
| 10 $\mu\text{M}$      | 1 $\mu\text{M}$          | 500 nM | 56.9               | 7.4  |

**Table S5.** Comparison of antenna effects (AE) in different systems.<sup>1-7</sup>

| AE   | Donor-recipient combination                                                           | Provenance                                   |
|------|---------------------------------------------------------------------------------------|----------------------------------------------|
| 7.5  | TPE-(Im) <sub>4</sub> & DBT ⊂ PH4                                                     | This article                                 |
| 3.6  | TPE-(TA-CN) <sub>4</sub> & DSA-(TA-CN) <sub>2</sub> ⊂ poly(MMA-co-MAAm-co-MMAP[5]A)-1 | <i>Adv. Mater.</i> 2019, 31, 1903962         |
| 12.2 | TPE-(CN) <sub>4</sub> & DSA-(TACN) <sub>2</sub> ⊂ P2 @ F127                           | <i>Chem. Eur. J.</i> 2024, 30, e202402808    |
| 10.1 | M-4 (M-DSA-2P[5]A)                                                                    | <i>J. Mater. Chem. C</i> , 2023, 11, 6607    |
| 1.3  | RB @ Ga-tpe                                                                           | <i>Chem. Sci.</i> 2023, 14, 9943             |
| 3.7  | BDA / TPPEM                                                                           | <i>J. Am. Chem. Soc.</i> 2022, 144, 5389     |
| 6.1  | TPE-BSBO @ PEI + DBT                                                                  | <i>Chem. Commun.</i> 2023, 59, 13301         |
| 7.8  | TPE-SAA + DBT                                                                         | <i>Adv. Optical Mater.</i> 2023, 11, 2201710 |
| 12.3 | SOF + DBT + SR101                                                                     | <i>J. Mater. Chem. A</i> , 2023, 11, 2627    |

## 8. Information encryption matrix

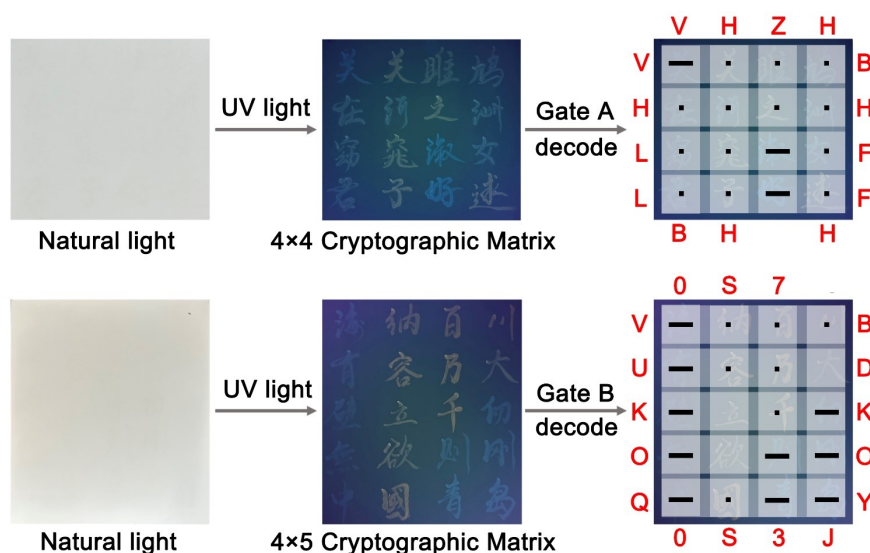

**Fig. S61.** Schematic illustration of information encryption matrix deciphered by different logic gates which were capable of storing Chinese, English and digits.



## References

1. X.-H. Wang, N. Song, W. Hou, C.-Y. Wang, Y. Wang, J. Tang and Y.-W. Yang, *Adv. Mater.* 2019, **31**, 1903962.
2. Y.-Q. Zhu, Z. Chen, Z.-Y. Chen, Z.-W. Zhou, Q. Bai, M.-X. Wu, X.-H. Wang, *Chem. Eur. J.* 2024, **30**, e202402808.
3. P.-P. Jia, L. Hu, W.-T. Dou, X.-D. Xu, H. Sun, Z.-Y. Peng, D.-Y. Zhang, H.-B. Yang and L. Xu, *J. Mater. Chem. C*, 2023, **11**, 6607-6615.
4. D. Li, L. Yang, W. Fang, X. Fu, H. Li, J. Li, X. Li and C. He, *Chem. Sci.* 2023, **14**, 9943-9950.
5. Y.-X. Yuan, J.-H. Jia, Y.-P. Song, F.-Y. Ye, Y.-S. Zheng, and S.-Q. Zang, *J. Am. Chem. Soc.* 2022, **144**, 5389-5399.
6. X.-L. Li, R.-Z. Zhang, K.-K. Niu., R.-Z. Dong, H. Liu, S.-S. Yu, Y.-B. W. and L.-B. Xing, *Chem. Commun.* 2023, **59**, 13301-13304.
7. L.-B. Xing, Y. Wang, X.-L. Li, N. Han, C.-Q. Ma, H. Liu, S. Yu, R. Wang, and S. Zhuo, *Adv. Optical Mater.* 2023, **11**, 2201710.
8. Y. Wang, C.-Q. Ma, X.-L. Li, R.-Z. Dong, H. Liu, R.-Z. Wang, S. Yu and L.-B. Xing, *J. Mater. Chem. A*, 2023, **11**, 2627-2633.
